# Supplementary material for: A Near-Chromosome Level Genome Assembly of the European Hoverfly, Sphaerophoria Rueppellii (Diptera: Syrphidae), and a Comparative Analysis of Insecticide Resistance-Related Gene Families in Hemipteran Crop Pests and Pollinators
Source: Research Square preprint supplement (doi:10.21203/rs.3.rs-1050342/v1), 2021-11-17
Supplement: Supplementary file 1 [file c70500cb5b6df77b14dc7cac.xlsx]

## Sheet: Overview
Additional file 1.
Manually curated insecticide resistance genes for Sphaerophoria rueppellii:
Sheet 1.	UDP-glycosyltransferases
Sheet 2.	Glutathione S-transferases
Sheet 3.	Carboxyl/choline esterases
Sheet 4.	ATP-binding cassette transporters
Sheet 5.	Cytochrome P450 monooxygenases

## Sheet: 1.UGTs
UGT36G1	MNYAVSSLFSFSADNLFFNMRVVIIIFLLFLTSNVNTVNGAKILGLFPYPGKSHFDFFHPLLLGLAEAGHEMTVVSYFPNEKPVANYTDLNLDGLPVIINYIDLKQIEMLQYWLREIKLPNYFVLYKLGMESCEAAFQSKAIKEVLISRKKFDVVLVENFANDCMLAIAHMLGAPVIGLTSHAPMPWHYSRMGSPFISSFMPNHFLGHSDQMGFLQRLNNLIHQRLFTLMHDLICQPLTNNLIRKYYGDSVPPIEQLVLNTSLMLINQHFSLNGPTPYAPGVVEVGGLHIQKAKPLDPELKQLLDNANNGAIYVSWGSMVRPETISPEKKEALVKALSQFDQLVLLKWPKSSIPNPPTNFYLREWMPQRDILCHPNVKVFMTHGGLLGTTEGCYCGVAI…
UGT36G2	MKLRYIIHLVCLAGLAHIEVKGARILGLFPYPGKSHFDFFHPLLLGLAEAGHDVTVVSCFPNKHPVGNYTDLVLHGLPIQKNVMDLKHIELMHFWLREMKFPQFHFINQKGIESCEAAFQSDAIKTVLKTSKKFDVVLVESFVNDCMMAIAYLLGAPAIGLTSHAVMPWHYNRMGSPFLSCFMPTLFLGHSNEMNFLQRLNNIIHHRVLILMHDLLCQRPTNNLIRKYYGESVPPIETLVMNTSVMLINQHYSLNGPMPYVPGFVEIGGLHIQKAKPLDAELKQLLDNAKNGVIYVSWGSMIRPETISPEKKEALIKALSQFDQLVLLKWPKSSLPNTPKNFYLREWMPQRDILCHPNVKVFMTHGGLLGTTEGCYCGVAIVATPFFGDQFLNAAAIEA…
UGT36G3	MKVEATALIVALLYCTITLAYGSKILALVPHPGKSHFDFFRPLFRGLAAVGHDVTVVSYFPNKEPIANYTDIVLSGMPIIANNIDLKIFENEQDLIDFKVPTFFMVNAWGLEGCEAAFNSKALKDLLSRKEIYDVVLIEQFSNDCMSAVAHVLQAPVVALSSCAIMPWHYKRMGSPFIPSFMPVNFLPHTDEMTFFQRLNNFFHYHAMNFLYDQITQKATNEMIRKYLGDSIPPIEELVLNTNVMLINQHYSLTGSVPYAPGIVEIGGLHIQAPSPLDPDVKALLDRSQRGVIYISWGSMIRPETLSADRREALLRALSKFDETILMKWSNETLASRPKNVHIRQWMPQREILCHPNVKVFLTHGGLLGTSESCHCGVPMVVTPIYGDQFLNSEAIRKR…
UGT36H1	MMKCLPFCVHSVLVLTLCLVFTEQSNILALFPHFGYSHFKVYFPILTALAERGHNVTVITYIKSSEPQSNYEELILEGRSGIDVFSLEDHIPSRSLWTLFMEFYVLHQEGQMACEVFYKSPHIEEIIRRHSVTQYDMVIMEIFNSDCYLGLPYLLQVPIVGLSSCALMPWHYARVALPDTPSYIQSEFIGFGEELIWQERLVNFVQSNAMKALYRLTEWKDNAMIKKYLNLDVDVREVAKTTSLVFVNQHYSLSGNRPLTSQVKEIGGVHIPRANKFSLIPKAIEDFLYASNETVLLISFGSMLRSSTIPKDKYNGIVEALKKLNLRVIWRWDSENVPFASSQFIFLKWVPQLSLLCHPKIKIFWGHGGMLGTTEAVYCGKPIIVTPFYGDQFLNGKAI…
UGT36I1	MYLLLRILLVTICINLINGYNILGLFPHPGISHFHFFHPIMRALAEAGHDVTVISHFPDKSPPAHYKDLVLTGVDPLTNSVNLKVFDNRPAYSHFLEFFLLHEWGKDACNHTIKSPALAQVLKHRTRYDVVIIEQFNTDCLMGVAHILKAPVIGVSSCALMPWHYERIGNPIIPSYIPALFMGQSEKMDFSHRVANWLSFHGLNFLYNQYSHKVATDLIRRKFGHDMPSTEDLVKETSLIFVNQHYSLSGAKPLSPAVIELGGIHIQKAKTLDADIQRYLDNAPDGVVLISWGSMIRADSLPTAKRDGLIKALKRLKQKVIWKWENDTLTHQPANVLVMKWLPQREILCHPNVKVFMTHAGLMGSTEAAYCGVPVVATPMYGDQFLNAAALVHRGMGTL…
UGT36I2	MNWLIVSLAFLGCSPFASSYNILGVFPHPGISHFHFFHPIMRGLAEAGHNVTVISHFPDKNPTENYTDLLLPPVDLIVNVVDLKALEKRRFYTPVHIFFSLHKWGEEACRNTFKSDALEQVLSGNIQYDLIIMEQFNTDCLMGVAHVLKVPVVALSSCPLMPWHYERVGNPIIPSYIPALFLGQSENIDFLHRVLNWFIFHGYNFLYDLYNQKLATELVRQRFGNDMPDTKELVMNTSLFFVNQHYSLSGAKPLSPAVIELGGIHIQNEIAPLSKDIQTFLDNAEHGVIVFSWGSVVRADSLSAEKLSALLNAFKRLKQRVIWKWENDTLPNQPKNVLVSKWLPQKDILRHPNVKVFMTHGGLLGSTEAAYNGIPVVVTPMFADQYHNAATMVERGMGI…
UGT37F1	MRAHNNFVILFGLLATVLIAQTESANILGVFTSSSPSHQIVHLSYIKILTDRGHNVTVLSTIPLKVKNPKYHHILIPPTEARTKQLDEQKAQMSRKEPQGIVEGIKSTISGLFAIGEMQSDALKDERFQDFMHNPDNKFDLVIVGYFFNDFHVGLGAHFKCPVIMSWAGASYDMVDKFVGNPPEIAYVPASVMFGVPDPLKFTGRLQNFFIKITTKILGLLIDGQMEKIYNEVFSPSDYPAFEEAKKKVSLLLLNYHFTDGVIRPNVPAVIECGGIQIKDKPDPLPEDLQKIFNSSSEHGVIYLSFGTNIKGDDLNPELFGILFKALSGLKQTVLWKWDGKNVPGNSPNIHYRQWLPQDDLLANPNVKLFITHAGKGGTAEAQFHGVPMVAIPMFADQL…
UGT37G1	MTTETSKIFVILGAIAALMISASESANILGVFPTTSPSHNIVHMSYVHALVERGHNVTVVTAIPLKDKNPKYHHILIPMTESRSKYMAEQKARALKKMSVALGVESVLQFGPTYADPLKDERFQALMHNPDNKFDLVIAAYFFNPFYVGVAAHFRCPMVWSYPNAPNDLLNKFIGNPPEIAYVPVSPLFGLPDFTTFSGRLRNFLVNIPVTIFTSLLDIQMNGIYKEIFPPSDYPSYADAKKKVSLILSNYHFTDGIVRPHVPALIECGGIQIKDKADSLPADLEKLFNASSEHGLIYLSFGSNIGSDGISPAKIQVMFKALSSLKQTVLWKWSDKKTPGTAPNIHYRDWLPQDDLLQHPNLKLFITHAGKGGVTEASHHGVPMVAVPMIVDQIGNTDQ…
UGT37H1	MITNFLCPEWDGIDKEDIWFQQAGITFNSRIFSWLIEKFKTVFIGISLKSYRVTGVAMIGKPNFVTIFGLLATLAVVAVEPANILAIFTSNSPSHQIIHMSHVRALCERGHNVTVVTTHPLKDKNPRYNHIIIPELESRKKAIGEEMKRIANHKMHTTWQYYEFAVVSLTSIPPVQYDAIKSDQFQEFMNNPGNKFDLVMLGYFFNDYLIGLGEHFKCPVVISLTSALNEFVDRYVGNPAEIAYVPSMMSLVKQDPMTFLGRLQLFYHRFVAKLLLFRMDNEFSVYYNDLFPPSKYPPIEEAAKRVSLLLVNSHLSEGIIRPTVPGVVHVGGIQIKEKPDPLPKDLQEIIDSSKHGVIYLSFGSNLGSKQIGEENIKNLYTVFSGLKQTVLWKWDDSPK…
UGT37J1	MIEERTCYRLQGLLALLAGASESANILGVLTSSSPSHNIIHMAYIRAMAERGHNVTVVTVLPLKDNNPKFHHIHIPHSEERKKEIEENKAKMLKQKGIIESIKNGLKAPFQLPILQADPLKDQRFQDFMNNPENKFDLIILGYFFNDFHLGLAAHFNCPVVLSYMSASTSLLDPYVGNPPEIAEIFPPSKYPPFEEVKKKVSLILCNSHFTEGIVRPNVPALVDVGGIQIKQKPDPLPENLQKIFNSSTEHGVIYLSFGSNIKSSDMNPKLYEILYKALAGLKQKVLWKWDAAETPGNASNIFYEKWLPQDDLLTNPNVKLFITHAGKGSVTESQYHGVPMVAIPFAADQASNAASVQRDGFGLSLDQKTMTEEELRQAILEVLENPKYAKKVKRFSSL…
UGT37K1	MRPPVISSALLLLFYCSSVSHAANILCLFTSTGKSHMIINMAIARTLVDRGHNVTVVTTLPTNDKNPKYHHIYIPPNEEDFAEFKNYLSTSTSRKNVWQANYDIFFANVARVRAQDKATKSPQFQELLNNSGNKFDVMIMGWIFNTYQLGFAAHFKCPVILTYVNHPTNLMLSLVGSPPSIATSPCIYPYDLSCFLNRVRNMFFNVLWTMFEEFGEYKMAQYYEEYFPAEKYPSFDEMKKNVSLIFCASHFIDGRVRPLTPAFIEIGGIQVKEKPDRLPADVEEFLKDATEGFILFSLGTNVKTSDISSNATLTMFKVLSQSKYKILWKWDSNDPPGNSSNIMFRNWLPQDDLLAHPKIKLFISHAGKGSLVEAQYHGVPILAIPVYGDQPGNAREMIA…
UGT37L1	MEISSVIIPLLVLSLCVSSAFASNILCLFTSTGTSHMIIHMALARTLAERGHNVTVVTILPLKDKNPKYNHIYLEPPEEEFASYRKMLTSASLVKGGWNSTKSLFWVSVERVKLQDRALQNPRFQELMNNPGNKFDAVILGVVFNTYLIGVAAHFKCPIMLSWVNQPNREYLAFVGSPWSVSSASVFGGGSADMIHFRNRLSNMFLAGFLVAIEVFSDYKMAQYYDYHFPADKYPPYGEMKKNISLVFCANHFSEGRIRPLTPGFIEIGGIQVKEKPDPLPIEVEDFIKNATDGFILFSLGTNVKTTDISSNATSAMFKVLSQSKYKVLWKWDSIDPPGTSSNIMFRKWFPQDDILAHPKLKLFITHAGRGSSTEAQYHGVPMLAIPVYGDQPSNAQEV…
UGT49E1	MNVRKSLCFALVLLVTITYSNAGRILAAFVFPGKSHHMMHKTLIKELLKRGHEVTYITSDSMGKNIGPNYTEVLIPPYDFWSDVQAHFQTDNLFELTSMTLAGFLKMLEIIGLTTTEHALKQPGVQEIFNRTDTTNVYDVLLAEQFYQEAFLTLGLKYNIPVVLSNTLGYESYMSQMMGVITPWSFVPHTFLPFDDKMTFWQRVSNTLASLYQDYYREFVYFPKHDELIRRQLSHLPMKIPKVTEMEKNIAVMLLNSYIPLTTPRPTVPSMIPIGGVHIYPPKPLPADIQKFLDEATEGAIYFSLGSNVRSADMPPEMLKIFLQVFGSMKQKVIWKFETDDFPELPKNVIVHKWMPQSDILAHPNVKVFITHGGLFGTQEGVYHAVPMLGMPFYCDQHL…
UGT49E2	MTGFMDMLDIIGEKATEHALLQPNVQEIFNRTDTENVYDLLLVSQFYQEAFLTLGLKYNIPVVTSSTLGYENFMSHMMGIIQPWSFVPHGFLPFDDRMNFWERVENSVASLYEDIHRAYVYLPKQDALVKKYLSHLPIKFPKASEMERNVSLILLNSHVPITTPRPTIAGMVPVGGMHIYPPKTLPANIQKFLDEATDGAIYFSLGTNIQSADMPPEKIKLFLEIFASMKQRVLWKFESDQIPELPKNVMVQKWMPQNDILAHPKVKVFITHGGLFGSQEGVYHGVPMLGMPFFCDQYLNIKKATKAGYALSLSFPDITKEDLKHSLTELLENPFYRDNMKRISEIFRDRPMGARETAIYWIEYIIRHKGAPHIRSAGLDLAWYQFYLLDIIASGVLIL…
UGT49E3	MNINKFVSITFVVLLTISHCNAAKILAAFVFPGKSHFMMHTVLIKELLKRGHEVTMITGMTLGENLGANYTEILTPEYNFWPEVGKFFNTKSIFDLASLSFIDFLKLTDLIGIMSTEFALQQPNVQEVFRRNDTKNVYDLLIVEQFYQEAFLTLALKYDIPTIASNTLGHQNFMSQIMGVITPWSFVPHGSLPLDEKMDFWERVWNTMASLYDDYFKEFVYFPKQDALVKKYLSHLPMKIPSVSEMKKNTSVMLLNSYVPLTSPRPTTYGFVEVGGMHIYPPKPLPADIKAFLDGATDGAIYFSLGSQVQSAELPPEKLNAFLENFAKMKQRILWKFEDDTLPGLPKNVMIKKWMPQGDILAHPNVKVFITHGGLFGSQEGVYYGIPMLGIPIYCDQFL…
UGT49E4	MIITKILSLTFVALLTVSCVDAARILAAFVFQAKSHYMMHNVLIKELINRGHEVTFITSNSMNKNLGDNYTEILIDPVYNYEPDIRNHFKTKGNLDFTNFSLVDFLKMLEIIGEKTTEHALKHPKVREIFHRNETHDVYDLLIVEQFYQEAFLALSYKYDIPVIASSTLGYENHMSQMMGLMTPWSYVPHGFLPFDDKMSFWERLKNTVASLYTDLYREFVYFPRQDALVKKYLSHLPMKIPKVSQMEKNISLMLLNSYVPLTKPRPSMLGMIPVGGMHIYPPNPLPADIKQFLDGATHGAIYFSLGSQVKTQNMPEDKLKAFLDVFASMKQRVLWKFEDNRITKLPKNVMIKKWMPQTDILAHPNVKVFITHGGLFGTQESVYHGVPMLGIPAYGDQF…
UGT50B4	MTPVSSAGLLLLLCVGGTFTADILMVTMGGTKSHKIPFWELAKGLISRGHNITFLSGFPADFSINGLHEITPSGLVEYIQNYTNWDLLGARMSGEMPISFWDGIRYAFQSCDAMLEDAETKELMNRNFDLAILDGAYPECALGMVRHYKIPFMYMNTVGFYTGSLSISGNPASYAITPNFYSAFTDNMNLIERAVNTAMQLSFAALHKVVIGLVHKVLQERLGADHPHPYDISKNVSFILQNGHAVVSYPRALNPNIAEVACIHCKPARPLPKDLEEFIASAGESGFIYVSMGSSVKAANMPESLRRLMVKTFARLPYHVLWKWEGSASEMHDLTPNVKLSRWLPQQDILGHRKLRAFVTHGGLLSMYETVYHGVPVVTMPVFCDHDVNSAKAEVDGYA…
UGT301D3	MKLTIFTAIILLSVPHFSSAYNILFMGPFPAPSHWLWLEHFVNGLVERGHHVTTITNFPSKRPNKNLTEIVLNPQFDIPKHYPKKAIFDLRFSSDFQNLQMWWSIGIRTSEFALNDTNVKKLIQSDKQFDLIILEQFFHESFLMFAHKFKAPIVTIGTMGYADNMDYAMGLMTPISIIPHLLLSYTDNMSFSQRAYNAYLSLYDYVFRRWHYMPQMQDMAERHFGKYVKEPLPSVRDLEKNISLMLINSHRSIDLPRPQMPGLVSVGGVHIMPAKSLPKDLQDFMDNSKHGVIYFSLGSYMKSTDMPVDKIQIILKAFGQLKQNVLWKFEDDSIKNLPKNVMIRKWMPQNDILAHKNVKLFITHGGLFGTQEGIHWGVPMLCMPLYGDQHRNTIKSVRE…
UGT302L1	MKWASVLLLLAIIGYGSAYKFLGVLPTMARSHFFVGSSLMKGLAEKGHEVTVISPFPAKKPIKNYRDIYTPNILEIFKAKADQMIKMRDQSIIEGFLGIYDMGIVIVNSTLSEPSVQKLMASGEKFDAVICEIFVTEALFGLAEHFNAPLIGISTFGATQWNTDLVGSPSPPSYVPNPFLPLTHKMSLIERIFNLGVTTFEHMYFNNFYMPRQREIFNKYFPNSKVGLDNIRKDTALVLLNSHVSLGFPRPYMPNMIEVGGMHIDRKQKPLPVELKKFIEEAKDGVIFFSMGSNLKSSSLPVEKRDAILKTFASLKQRVMWKFEDKNLPGKSDNVLISDWFPQQDILAHPNVKLFITHGGLLSTTESIFLSKPFIGIPMFGDQYLNMARAEIGGYGIMV…
UGT302L2	MNFLNKSWIVVLLLVAVLNESSSYKILGIFPSMLKSHFFIGGTLMKGLAEKGHDVTVISPFPQKTPLENYHDVVTPNILNIFKDFSNNTVSLRENTFIDALKEVYNLGMIISNSTLSEPSVKELLASGQKFDAVICEVFVSDAIYGIAEHFNAPLIGLSTIGAHLWNTELVGSPTPPSYMPSDFLPYGQHMTLYERIMNLIYKSIEYYFLNYYFLPTQEKIFAQYFPNSKLGLDKIRKNTALVLLNSHVSLGKPRPYMPNMIEVGGIHINRKKTPLPADIKKYLDEAKDGAIYFSMGSGMKSSSMPIEKRNAILATFKSLKQRVLWKFEDTNLPGKSDNVLIRDWFPQKDVLAHPNVKLFITHGGLLSTLETIYVGKPLIGIPMFGDQYMNMAKAAAEG…
UGT302L3	MGLRDMSVVEALIDIYKTGLIITNSTLSEPSVQQLMASGEKFDAVICEIFLTESLFGLAEHFDAPLIGLGTFGATLWNTDLVGSPSPPSYVPITFLPLTNRMTLGERILNLAVTTFETIAHNVYYMPKQRELFKQYFPNSKAGLDNIRKDTSLVLLNSHVSLSFARPYMPNMIEVGGMHINPKNKSTPLPPNMQKFLDEATHGAIYFSMGSNLKSSLLPIEKRDAILRTFKSLKQRVLWKFEDTDLPGKSDNVFISDWFPQEDILAHPNVKLFITHGGLLSSTESIYYGKPFVGIPMFGDQFLNMARAEIGGYGVMVDYNDLNEEVFSKAINKILNNPDYGKLAKAMSARYRDQPMKPLDLAVYWVEYIARHKGAPHLHSAGQDLGFIQYHNIDAMAIL…
UGT308L1	MEVKYKVTAFILLWGCLSSLGYGANILGLMPVVSPSHHIWNSVLMHRLGELGHNVTILSVDIPKPNEKIPPNVHYIHLEKGYSIYQENDTKLDIEEFITAGPFKGIRLFNDAVIVMAEAIFESNGIKTLLNYPDNFKFDLVILDYTSGPFMLGFLHKFNYPPLIGMSAFHNPPITADFMSSHHFPAYIPFHGTMYLTEMNFWERLHNTLLFIYDTGLRRLTLSARLDALARKYFSNDIPDLDELGRRMTIALVNSHPATNYVEPLPPSVIEVGGMQIIEPKPLPKDLEDFINKSKNGAIFFSFGTNMKPQDFTDEQVRTIVNAMAQLPEYNFMWKFDMKYLKEKIPKNVLVRTFYPQRDILAHPKIKAFVTHCGGLSSHEATWRGVPMVGVPLFVDQHE…
UGT308L2	MDLKYKVIVFILHWSCLSSLGDGANILGLMPIVSPSHHVWNSVLMHKLGELGHNVTVLSVDIPKPNEKIPPSVHYIHLEKGYSIYQENDTKLDINEFITAGAFKGIRLFNDAVTLMAEVILESNGFKTLLNYPDNFKFDLVILDFTMGPSLLGFLHKFNYPPLIGMSAFHNPPITADFMSSHHFPAYIPFHGTMYRTEMNFWERLRNTLLFIYDTGYRRLIVSGRLNALARKYFSEDIPDLDELGRRMTIALVNSHPATNYVEPLPPSVIEVGGMQIIDPKPLPKDLEDFVNKSKKGAVFFSFGTNMKPQDFTDEQVRTIVNAMAQLPEYNFMWKFDVNYLKEKIPINVLVKTFYPQRDILAHPKIKAFVTHCGGLSSHEATWRGVPIVGVPLFVDQHR…
UGT308L3	MDTKGSIICLILVLGYCTSPGEAANILGLMPIVSPSHHIWNSVLMHKLGELGHNVTILSVNVPKDKDKVPPSVHYIHLEKGYSIYEENDTKIDISDLINANPFSSISLWNDAILVIAELLYQSDGFQTLLNYPKDFKFDLVVHDYTMGSLLLGFMHEFNYPPLIGISAFHNPPITVDYMANHFFPAYIPFHATLYRTEMNFWQRLHNILLFIYDIGYRRLILSPKLDALAQNYHSKGLPSLDEIGRRTAISLVNSHPATNYVEPVPPNVIEVGGLQIADPKSLPKDLEDFINTSRKGAVFFSFGTNMKPQDFTDEQVRTIVSAMAQLPEYNFMWKFDVKYLKEKIPKNVLIRTFYPQRDILAHPRLKSFVTHCGGLSTHEATWRGVPMVVVPLFVDQHR…
UGT308L5	MQSKTIYTITSVLLILTNYSFEVHGANILGLLGMTSPSSQIWNTVLLHKLAEIGHNVTILSVDLPKSMEKLPPNLHYIYLEKGYAMYDSEKSEKKVDIVDYIGFHNPFKSIPPFYAFGIETCNGIVASKGLKTLLDYPNDFKFDLILNDYTLGPYLLGFLHKFKYPPLIGLTAFHNSPLTIDAMFNHYFPAYVPYHSTIYSPEMSFLERLENTLIFIADTAYRRLVYLPQIDAIMRPYFGEDTPYLGDLSAHTALSMVNSHPAIDYAEPLPPNVIEVGGMQILDAKPLPKDLDEFMNKSRKGVVFISFGTNMKSEDFGEERVKVFLGAMSELPEYNFMWKFDKKYLTSKLPENVLVQTFFPQRDILAHPKIKAFVTHCGGLSSQEATWRGVPMIGVPLF…
UGT308L6	MSAFHNPPITMDLMSNHYFPAYIPYHSTTYSPVMNFWQRLENTLILIADTAYRRLVFVPRVDALVRPYFSSNMSYLGDISRHTAIALVNSHPAINFVEPLPPNVIEVGGMQMLEPKPLPKDLEEFLNTTTDGAIFISFGTNMKSQDFTEEQVNVIVDAMVELPQYKFMWKFDEKYLKRTLPKNVMAKTIFPQSDILAHRNMKAFVTHCGGLSSQEAMWRGVPMVGVPLFFDQHRNFRQSADAGIAVKLDFLTMTTKDLVGAIKKVIEDPQMRRNIREKSIQFRTRPMKPLDTAVWWVEYILQNPNPYHLKSHAERLNIFQANSLDCLLFILAVIVLSVYLIVVITAYIWRKISQILAPTKVKIN
UGT308M1	MRPYFAKNMPTLAELEKHTKLSMVNSHSTITYVEPVPPNVIEIGGMQVIEPKRLPEDFEGFLNNTQKKVILFSFGTNMKSTDFKDNQLEVILNAMKGLPQYDFIWKFDVKHLKQKLPSNIFVRPFLPQNDLLAHPKIKAFVTHCGALSTHESIWRGVPMIGVPLYFDQHRNIHRSILSGIAVELDFRTMTTEELLNAIMHVVESPQMAAKAKYISAQFRDRPMKPLDTAVWWTEYLLRNPNPVHLQSPAAKLNIFQANSLDVLLVLWTLLVLLTWLGVRVLLTTWKQLNGLLKPPTKTSKLKKQ
UGT314B1	MSLFAKLLFAITLVLLTSGIHNTNGERLLVILPVPLRDHQIVFRPLIGALAQRGHNLTIVTTDPENFINTANGESLYSEQIELIDLSFAHRLSVLNMLNNHENMMSGSDMLLTVFHVMRTVAVEELKSPQMQGLLGNKSILRHRQDNNEEFDAVLVDWSGPALMNAFAHKFKAPLIGITPGGAYITTHEVIGNPNHPVAFPSIFMPFSEDLSLFQRVASTIFTLKSRYLYFNEELPKQDEIVKNFFGRDTPSIWEIESNADLLLVNCYQALGNARPVGPTTIHMGGIHSIAMEDNDKSLSSLLPWHLQHFFESKIVSGAAGGNNNNNYYVAYINLGAMLTRAFFESHRMEKLVKILEKSSFDVVLNMNGIDDSYALNTTTKIYLGSDFEQEILLAQENV…
UGT316B1	MPLFSPCKISSFLSLVFAPFLLSITTTTIPRSTYAANILAVFPSVWKSHYLYGRAILQELVATQHHNVTLISAFKSVTRGENTPTELPHNNSSRSKTILNEIQINGIEQNWLEMGLSTQIDNMNDKSIMERFTRMVYAGVSATDLVLGSKEIRKLLASNESFDLLIADIFLGDALLGLSHFYKVPIVVVSPTGPNTWINEMTGNPQNSALDPSNFLPYLEVMTLGERIINTLMAMFEKLTYNFFHMISHQAVYEKHFEALAAERSEVLPHHRDLTHNISLVLLNSHPVVQYPKAFLPNVIEVGGIHLRNEKLPEHLLRFIDDSEDGVIYISFGADIKISEASEQKLDILFHALETLTESTRVLLKWEDSLEKHDLRTKNIFTSEWFPQQAILAHPKVKL…
UGT430A1	MSIIRALVERGHNVTVITAMPINPGYRHIFLMHHAVTSSSVNSIVNDSKDVPFYPRSITYFFLIKRVSEAFTNFTSDPAYIDFINENNHFDLMIHGYLKNSFHFRVAAHFKCPLVLSLETVVVGDCSRLIGNPTNPAFVSLFPFIDSKPMDFLGRVNNLILSIMEWVIMYSFEFNSWRLYYKNFPADRYPSNSEMKKNISLILFIHHFSEGPVRPLVPGLVQFGGIQIKDKPDPLPKVNSIDQKHLQLFFKVLSTLSFNVIWKSDEADQPGNASNIFFKKWLPQDDILAHKNIKLFITHAHVFLTESEYHAVPMVVLPVIGDQFVNAEIMAEKGHGVSLDYASMTGESFRAAILKVIEDEKYRDAVGKFSRIYRDRPLTARENAVYWNEYVIRHQRSTS…
UGT430B1	MKIYLGVLVIIFLQTLRFTESSNILGVFLTHSRSNVILHMAVVRALIERGHNLTIITSIPLNEPNPGYRHIFLKQQELSQNDMDKMINEAKTTPVHLKIFKVFGLIKKIISQYSEFTTDPDFVEFLKEENSFDLMILGYGFNDLPLGIAAHFKCPVVVSFPIQPFGQVSRMIGNPTHTSFVPFAPFMESNPMDLTGRIINVFLSSAERILTAVLHFFSERLYEKNFPQDRYRSLAEMKENISLILFNHHFSEGPVRPLVPGLVEIGGIQIKDKPDPLPQDIQSFLDNSKRGAILFSLGSNVREHHLGSNGTEVIYKVLSTLPYNVIWKYDSQTLPGNATNILFSKWLPQDDILAHQNLRLFITHGGKGSITESEYHEVPMVALPVYGDQPKNSAIMQNK…
UGT430C1	MIFFNKCVLFGILLFQSLSNVTASNILGFFLTHSPSHVIVSMGVVRALVDRGHNVTVVTSMKLNDPNFGYRHIYLKTLEHTQNDTFAMMDTVFQAPFYLKPIRFIEAITKVIEKYSSYNMDPDYISFKKENNHFDLLLLGYQYNEASLGEAAFFKCPTVAIWMMQPFGHIARLIGQPNLPAIVPYSPFIPPTPMDFQNRVLNYVFYALEGLVTMFSDMFMARLYDQMYPSNEYPSYEVMGKNLSIMFYNHHFSEGPVRPLIPALIEIGGIQIKDKPDPLPSDIQTFLDASPQGAIYFSLGSNACGLHVKEKTIKMIFDVLASIKYNVLWKLDDIKHPGNSSNILFKKWLPQDDILSHKNVKLFITHAGKGGVTESEYHAVPMVALPIMDDQPSNAKTME…
UGT430D1	MKLQLRVIAAILLLQHAAVSVGAANILGMFLSHSPSHVIVNLGIVRGLVERGHNVTIITSVPVKDKNPGYRNIYLKTIDFSPETFFKQLNDETGLWKIFKTFKLLLEIVFEKFAKYPSDPAFVSFLKEDNHFDLVLLGYMFNDYQLGVAAHFKCPVALTIMVQAFGSIHRIVGNPPHPEFVPFSPFMDPKPMDFLGRVKNFGASIIDKTFFAIMGAFSERVYNDIYPSDKYPSLTEMKNNVSLILVNHHFSEGPIRPLVPAVVEIGGITIKDKPGPLPEDIQKFLDSSTKGAIFFSLGSNVKSHHLGQNVTEIIYKTLSTIPYNVIMKIDTEKPPVKASNILFKKWLPQDDILAHKNLKLFITHGGKGSVTESEYHQVPMVALPVFGDQLQNAESMQDK…
UGT430D2	MRFEIGTVCISFLAIITNTGAANILGMFLSYSPSHLIVHMGTVRALVEQGHNVTIITSLPLKDKNPRYRHIFLKTLKTSTDDSNLLINETKDSSLALMKVFKTFMFIKQMIHKYSKFKSDPAFIDFMNEDNQFDLMLLGYAFNEYQLGVAAHFKCPVVLSWMLQPYGHLNRLIGNPTHSEFVPFITMDSKPMDFVDRVFCFLVDIIERIFCSLLEILNKGIYAELFPSDKYPSLTEMQNNISLILVNHHFSEGPVRPMVPGIVEIGGITVKESQDPLPDDISGFLENSPKGAILFSLGSNLKVHHLGKEFISIVYDTLSTLPYRVIWKFDGETLPGNASNILFKQWLPQDDILAHKNLKLFISHAGKGGVTESEYHQVPMVALPIFGDQLKNADTLQSK…
UGT430D3	MSVITSMPLKKKHLNFRHIFLKNLDISAAEVNRLVNEMKDAPTYLKVVKTFTATKELFDRYSKFTRDPAFIEFMQENNQFDLMLLGYEYNEYQLGVAAHFKCPVVLSWVLQPFGYLDRLIGNPTHPEFVPFGLMDPEPMNFPRRVLGFIVYIFERVFSGIFGIMIERVYDENFPPDRYPTFDEVQKNVSLLLFNHHFSEGPIRPLVPGMVEVGGIQIKDKPDLLPEDIQKVLDDSSRGAILFSLGSNVKLDNLGANRTQFIYKTLAGLPYKVIWKIGNDNPPGNASNILFRKWLPQDDILAHKNLKLFITHGGKGSITESEYHQVPMVVLPIYGDQPTNAEKVQSKGHGLTLDIHSLTEDVFKKTILEVMENDKYRNKVQSFSEIYRDRPLTARQNAVY…
UGT431A1	MFSSLNISLVFLITTSTVLFADSARILGLFPTPFKSHLIIHSAIVDALVERGHDVTVVSTLPKVNKNSKFSHIQLDVKEFSPTLLADYVNNPPLLYKRYNFFMDEINRYANDSLNHPAMQKLMREESFDLVIQGFFLNEFLVGVAAHFKCPVVMSFMIRTLPRINNLVGNPQEIAYVPSIMTGGNQPMGFFDRVKHFVCVSFMENGVLEYIAQWNQKRFYNSNFPQGKYPPFEDMIKNISLVLTNHHFSQSPIRPDVPALIEIGGIQIQEKPSPLPEDLKSILDNSTEHGVIYFSIGSNIPASKLDPGKVKVIFDVLSKVPQTILWKWDSDNLPGKSPNIIYRTWLPQESVLSHPNVKLFLTHGGQGSVVESQFYGVPMVGIPMFGDQHANMENVELLG…
UGT431B1	MSRSVQLILIVCCVLSCLITPNESARILGLFATPSKSHLIIHNSLADALVERGHDVTVVTTIPLLKKTHKFRHIQLDSPEGVENFLASEINNPVPWYRKFSKFGDFLTNYAANSLNQTKMHKLMDEESFDLVVLGYFMNDIMLGLGAHFKCPIVMSFMIQSTSMTNGLVGNPNELSYVPSLFLGIKQPLGFFDRVKNFLVVGFLEEILMKSIFHWYQADAYRAHFPPDKYPSFDEAKQNLSLILVNHHFSQTPIRPNVPAIVEVGGIQIKEKPDPLPQDIKTILDTAKNGVIYFSLGSNVQGKFLDAAKVKIIFDVLSKLPQTVLWKWGDSQPPGKSPNIFFKNWLPQDDVLNHKNVTLFITHGGQGSVVESQYHGVPMVGIPLFGEQDSNMENVVKAG…
UGT431C1	MSLPITKYIYTYFCLSILIAVVEPARVLGFFPTPTKSHLIIHSAVANALAERGHDVTVVSTHKPIHKNPPYRYIQLDVPGFSHSEFSKVMAMPLPWYRRMDTNMRIWNNYANISLNQPAMKRLMAEESFDMVILGYFYNHFLLGVAAHFKCPVVMSFMIRPIPSLTELVGNPDEVAYVPSIRIETDQPLGFLARVRNFVGVNFMDKIYLKWLLNSYQSELYNQNFPPSKYPSYEDMLKNVSLILTNHHFSQGLIRPYVPALVEIGGIQIKNKPDPLPEDIKSIMDNATEHGVVYFSLGTSIEGSALEPKKLAALFNTLAKLKQTVLWKWGDSKLPGDSPNIFFKSWLPQDDILAHPNVRLFITHGGQGSVVESSFHGVPMVGIPIYADQSSNIESVVRQ…
UGT431C2	MSLSKKVLFSGFLLIAALIVASDSARVLGYFPTPSKSHLIVHSSVAKALAENGHDVTVVSNHKSIHKNPPYRYIELKVPYDKDFISKTVSSPMPIYKRVKAMMDTFNGLANSSLNHPEMQKLMAEESFDMVILGYFFNEFFLGIAAHFKCPVVLSFPIRSVSVLNMMVGNPNEVAYVPSSSGEGKQPLNFWQRVMNFLTVNIAEGVAMHYFQKWYQDDLYIKNFPADKYPSFDEMKKNVSLVLTNHHFSQGPIRPDVPAMIEIGGIQIKDKPDPLPEDLKTIFDNATEHGIVYFSLGSNVQGNKLDPVKFKAIFNVLSRLPQTVVWKWGDSQTPGTSPNIIYKNWLPQDDILPHPNVKLFITHGGLGSVVESTFHGVPMVGIPIFADQSSNMEGVVKQG…
UGT431D1	MNLFALLCITSVFGFTHSARILGLFPTHSRSHLIIHSAVAEALAEQGHDVTVVTNHSPIKKSYPYRYIYLDIPPIPGEIFSQAVNKRPAFHTTITAFISACSEISNSSLHHPSMQKLMREESFDLVLHGYFLNHFLFGVAAHFKCPLILVFTVRPFTSVNDLIGNPNEFSYVPTIGTSSKQPIDFFERVYNFIFIRIWRELQYRPYLKWNQEKYYRANFPADKFPSLEDMRKNISLIFTAHHFSQGPIRPDVPAMVEIGGIQIKDKPDPLPEDIKTILDNSADNGAIYFSLGTNIFKGHLDPMKLKTIFKVLAELPQTVLCKWSDDEIPVESPNIFYKKWLPQDDVLNHPNVKLFVTHGGLGGMAEAQFHGVPMVGIPLLNDQPVNVENMVNSGFGLHL…
UGT431D2	MTTCAVVEALAERGHDVTVVTNHLPHKDNLPYRYIYVKVPPISSTVFAEGVNDRPHFYKLITSFIDLAAEISNSTLHDPSMQRLMREESFDLVLHGYLFNEFLFGVAAHFKCPIVLSFSLRIITNLNDLIGNPQEYSYVPTLATNSKQPIGFLERVENFIYVTVGRELAYRPYLRMTQESYYRANFPSDKYPSLEAMMKNVSLILTAHHFSQGPIRPDVPAVVEIGGIQIKDKPDPLPEDIQSILDNSTEHGAIYFSLGTNIYNSHLDPAKVKAIFKVLSELPQTVLCKWSDDEVPLKSPNIFYKKWLPQDDVLSHRNLKLFITHGGLGGVTEAQYHGVPMVGIPLLNDQPVNMENVVNSGFGLSLEYINLSEESVRDAVVEVLHNPKYSESVKRFSRL…
UGT431E1	MAPRQNVILVCVVLLTTFATLTNSARILGLFLTPMKSHIIIHSAVAEALAERGHDVTVVASHPPLKKDLPYRYIQLAVPGLATNVMADAVNRPPPWYKRIFQFLDSMNHYANSSLHQPQLQKLMQEESFDLVVHGYFFNEFLLGVAAHFKCPVVMTFTIRTVPNLNVMVGNPQEKSYVPTVMAGGKQPLGFMERIWNFVYVSFIEELALEMYLYWEQSKLYKANFPSDKYPSFDDMKKNISLIMTNHHFSQRPIRPDVPALIEIGGIQIKDKPDPLPEDIKSILDNSTQNGVIYFSLGTNINKGHLDGSKVKIIFDVLAKLPQTVLWKWGDSEVPGESPNIVYRKWLPQDDILAHRNVRLFVTHGGQGSVVESQYHGVPMVGIPLFNEQGTNVNNFVKE…
UGT431F1	MAFPLNPKFVIAIILCLAIQTSDSARILGLFPTHSKSHLIIHSAIADVLAENGHNVTVVSTLPPISTNSQYRYIQLDVDYPNFFTEMLKNPLPWYKRFTGFIDFVTGYANVSLNQPELRKLMDEETFDLVIQGYFFNEFLLGVAAHFKCPVVMSCTVRPFPYVNNLVGNPLELSYVPSLVGGGKQPMGFFDRLRNFLFVVFFENGIEDMYGQWRQSKLYSENFPLSKYPSYGEMKQNVSLVLVNHHFSQGPIRPDVPAMVEIGGIQIDDNSSPLPQDLQAILDNATQHGVIYFSLGTNIQPGALAQHDKFKILFNVLSKLPQTVLWKWNNDSTLPGQSQNIIYRNWLPQNDILSHPNVKLFITHGGLGSVVESQYHGVPMIGIPMFGDQFANVGNVEKL…
UGT432A1	MVKFTILLILVTLVRVNNSANVLCMFTSPAKTQIYTFMAVARTLIERDHNVTIVTTIPIPFEAMSRKPFRHVFLKSPPESIRFLNQNMFELSEEFASKFTIIKCVFLTVSMFTRVQKNALESKQFQEFLNEDNHFDLMILGYFHNDFTVGVAARYRCSIAVVSLAAPFGSINRMIGNPAETTYVQMPFFGTSQPMSFMERAKNFLWSGVVPLVQLYADYQMESIYRSLFPDESYPSYSDVISNISLVLYNRHFSEMPIRPLVPALVEIGGIQDEDQSELLPQDIKEFLDAADQGAIFFRVGSIARSTELKPDQIAIILNELSNLNQRTVWEWEHTEKLPPTNYSNIMFRPFIVPNTILPHPNIKLYITDGRPLGIHEATYHGVPMLGLPLFGEELYAVE…
UGT433A1	MRAILLFGVLISLGACQVNGSNILGLFPYPSQSHFNSILPVMTRLAKNNHNVTSISNFRLGEKLDNFEEVIVPVYDFWSNVRKELGVRNMFEASRSSSNAIHSALRTTGANLIDFFLQQPKLKAILESKGKFKYDLIIVDLFHTEALVMISDVFLTPAVGIASSNFENYMTDLVDAAVPSECSPIDFEDSSQGASFVQRISNILGCTERRGHRQKDLSAQEIVARKHLSAIGHPLRPLRELMSQTLTLLNNYPPLLTPRPTVPNIVPIGGTHINQAQEIQWNIKRFLDDAREGAIYFSLGTVLKCSDLDVEKLNAILRVIGKLKEKVLWHCDLKKVDNQPKNLLLQNIVKSSDVLAHPHVTFFMTSGGLLGLQEAIFRGVPILGIPVFRDHHINLRAVE…
UGT435A1	MVVLGLTFISLFHVGLAANILGLMGCASHSHHLWNEVIVNALADRGHTLTVVSVDENNSPHPNVTYVHLEDAYNTVAEYYKDSDASLDVYGPFANIRLYSNFKILSCKGIFKSMGFNEASNLRQKFDLIVFDISAGPCMMRLIQKYPNIPAVGVSAFKIDPFIVDILGGHRFPGYVPYFLEHKDVPMNLWTRITNSATYVFAHFLRKIITEPTIEDYAQQYVPGKRPTLESLYKRVKIALINTHPAIDYTQSLPPNVIEVGGLHIKDPQNLPKDIQNFIESSEEGAILISLGSNTIVETIGAKRIEAILSVVKSFPRYNFLWKVENDKIFKDIPKNLMTHKWLPQSDILAHPKTKAFFTHAGGLGMQEATWHGVPVIAMPLLLDQFSNAHSARSKGCGI…

## Sheet: 2.GSTs
Maker_SR0002695-RA	MLRLESRTLEKPEFLFEKSPLGKVPALELPNEEGCPTILGSLAICEYLDEKYPQNPLLPRDPLKKYYDNTLMEKFGAVMSAWSKVYLIGPSKSPGCVEEATEALTEFDKELATRKTIFFGGDKPAWVDYMIWPWCERLAMVKHLDGEKYDVDYGKLKTLAKWIDAMKEDRAVKLFFLDGKTHAMHVKSKHTGKPEYDILVKA
Maker_SR0003717A-RA	MYKTKQVQSKSSKPILYYDPRSPACRAVLLVAAEIGIKLDLRLMDPVTNPNHMLYPVLEDNGLRVDDCKRVCVYLADKYSSNDNLCPKELEARNYVMNSLFFGSREIYLRAQYEPDSECAKVHIKLIEFGYEVIELWLTKHRQPYVCGKHLTIADLCCIVVLPRGHELVPIDAVKFPKLFRWVKRMSALPYYKKCNFEGAKLLESWTKCNGEDAKSLKNSDKNNGKVVNIIKRSTKCNVNGAKSLKSSTKSHGGSAKTVKSSTNSNEEFSMTLRSRRNLKKEN
Maker_SR0003717-RA	MSSKPILYYAARSPPCRAVLLAAAEIGVELDLRPMNLMNGEHKTPEFLKLNPQHTIPVLDDNGVVITDSHVICAYLADKYSTNDNLYPKELVARNNVMTRLFFDCGHLFPRVRMAVEPVFYFGRADVPQETVEYIQKAYDNMEYCLTGQPYVCGKHMTIADLCCIATISTAHDVAPIDKVKFPNLFGWVERMSALPYYEKCNGEGAKMLKSVLLQKLEENKKK
Maker_SR0003832-RA	MKPILYYDDRSPPVRSCLLLIKILNIDAELKFIDLFKGDQLTPEFREINPAHSVPVLQHNGLTLTDSHAILIYLCEQFDGGAAWWPEDKLQRIEVINKLFFECSFLFRRDSDMMSEIVRKGFDNIDLPYHERKILEVYSGLEKNLSLNRFMSGSYMSVADLSFLTTLSTVDLMFPITAEKWPRLNEWFENMKQSLGATYIDCNAIGLDKLKNIVEKIGKFKFPSRANE
Maker_SR0003839A-RA	MVLILYGLEPSPACRTVLLTLNALGVEFKIKKVQINRGEQKSEKFRKKNPLQLVPVLDDEGQYISDSHAISAYLVRKYARDDSLYPKDFKQRALVDQRLFFDSGVLFAALNSITRKVFLLGDPVIPQEKQEAVVSGYEFLEKFLEQSNYVAGGNVTIADFSILATVTSLDCLVSIDGKRFPKIILWKELMTKLPYYERGNELGLALFAKKCDECMKKE
Maker_SR0003839B-RA	MSKPALYYALVSPPSRACMLTAKLIGLDVNLKPVDLAKKENLSKEFIKLNPTHQIPVLVDGNEPYGDSHAIMAYMVSKYAKNDCLHPKDLSKRARVDQRLHFETGMVFQVFKDFVSRIIHGSETEYNSKTIQNCHITYGFLDKFLENQNYVAGNELTIADVSINTSLITLHRLIPVEKEKYANTFAWLERMKCLPDNEEINEKGADQLAALLCSRLAENQSKAK
Maker_SR0003839C-RA	MSKPTLYYALFSPPARACMITAKLIGLDVDLKFVDFAKKEHLSEEFIKLNPQHQIPVLVDENEPYWDSHAIMAYIVSKYAKTDSLYPKDLSKRARVDQRLHYENGVLFQVIKDLVSRIIYGGETEYNSKTIQNCHTAYEFLEKFLENQNYVVGNELTIADVSIHTTLITLHRLIPVEKEKYPKIVAWLERMKSLPDNEEINEKGADQLALRISSCLADNQSKAK
Maker_SR0003839D-RA	MGKLILYGHEFSPPVRAVLLTLNALELDYEFKLVDLLSGETKSKEHQQRNPQHTIPVLEDDGQFIWDSHAIAAYLVRKYAKNDDLYPKDFLKRAVVDQRLHFESGNLFACARNITAPLFLRNVTVIPQEKIDLLYEGLNFLETFLTDDYVAGPTMTIADFSIVATVTSFGALSPIDPEKTPKVVAWIKRMEKLPYYEKANGKGAALCVAVLKEKFAPKQ
Maker_SR0003839-RA	MGKLVLYGVEASPPVRAVLLTLKALNLDYKFQEVDLFNGGNKSEEFLKKNPQHTVPVLDDGGQYIWDSHAIIAYLVRKYAKTDDLYPKDFVKRAIVDQRLHFESGVLFARLRNITLPIWFSGCKVVPQEKKDAVYEGLDFLETFLQHDYVAGDSLTIADFSIVSTVTSLNLLAPIDPVKYPKIMAWIGRLSKLPYYKEANAKGAAILDGLLKKQMS
Maker_SR0003840-RA	MVKLILYGIEASAPVRAVLLTLHALDLDYEFKTVDVVNGENRSDEFKKKNPQHTIPVLEDNGQFIWDSHAIAAYLVRKYGKNDHRQASVPKDKAAMLYEGLDFLEMFLEHDYVAGNMMTIADLSIISTVSTCEAIASIDSSRTPKVVAWMKRMSALPYYEKANGRGAAICTEMIKAKLSLK
Maker_SR0003841-RA	MVTLKLYGTLISPPVRAVLLTLNELSLDFEFIEVDVFKGEQNSEEFIKKNPQHTVPVLQDGDCEFISDSHAIIAYLVRKYGQSDSLYPKDFYRRAVVDQRLHFESGILFARCLKALRSATETVEEKMKNIEEAYEFLERFLESNKYMAGDHLTIADFSILSSTSTLNFVVKIDPSKTPKLHEWLEQMKQLPYYEKANGEGLTLVIEKLKPILLALTKESQE
Maker_SR0003874-RA	MIGDHTIIETFTSLEHRPRCILPLKIFNRNTHASRNAYQFTLEPNFGRTVMFRESFFSRTTRIPIHLLTEELLTPEFIKRNPQHTIPTLDDNGVIIYDSHAVCAYLVGKYGSDDKLYPRDLVKRAKVDARLHFDSGHLNAGGRMLFEPILCHRSYDCSSEKIAFIQKCWDILENFLKESLFLCGDDLTIADLCCITTITSVNDGAVIDEAKY
Maker_SR0008172-RA	MPPILYYLPPSPPCRSILMLAKMLDMEFDMKLVNIMEGEQLKPEFVELNPQHCLPTVDDDGLVLWESRAILAYLVSAYGKDDKLYPKDIRVRALVDQRLQFDLGTLYARMADYFVSIDLIVLSILIRGRLKN
Maker_SR0008419-RA	MPMKLYGVSDGPPTLAVCMTLKALNIPFEYVNVNFNKSEHLTESYAKMNPQKEIPVLDDNGFYLQESNAIIQYICDKYGPNSPLYPKDPTARAIVNQRLFFNMGFYYSAIGAHALAPIFFDYERTPMGLKKVENALKVFETYLQRSNTKYAAANNLTIADFVLITATMCLESINFDISGYPLVKKWYEMFKKEHPELWAVAEKGMLELAEAEKNPPDLSAMNHPFHPTRKAKK
Transfer_SR00000836-RA	MARPIAYYYDLMSQPSRAMWIIFKMSNTPFEDCPVALRRREHMSSEFKQNINRFQKVPCIIDNGFKLAESVAILRYLHKKGNISSTLYPNEVKEQARVDEFLEWHHLTLRLGCAMFFRAKILEPLMTGQEPKAERVEKLKGSMEGNLDIFEKVWLEKGQYLTGDRLTAADIFAACEIEQTRAAGYDACDKYPKIKEWINKVRKEASPHYEAAHKYLNKLASVQAKL
Transfer_SR00000837-RA	MSTSLRLYIDFISQPCRSLYIILKKSGVPFEKVLIDLAKGQQLTNEYKNTNRFQKVPCITDGSFQLSESAAILRYLSSTKRISESLYESNDIQKRARIDEFLQWHYYLRNEIMNVFYLEWLNPMRTGKLTPANELQDAKRNMETVFGIVEKTWLGESKFVTGNELTVADIFGVSEIQQTCLTKYDVGKKYPKIAEWIENVRKETNPHFDDAHNILYKIAKKSGH
Transfer_SR00002599-RA	MQPIKFYFDVISQPCRALYILLEAAKIPYEAIPVNLLKGEHMTKEFAEKVNPFKKVPVINDHGFKLTESVAILRHLNREKIVPEHWYPRANLARSRIDEYMEWQQTNMRPACSSYFQVKWLLPVVNKTRPNDDDINMAAKRLDHTITQFEKAFLNSNKFMVGRAVSFADVLAICEIDQPVSLGYDPFTNRAKLTQWYEVVRKELGPIYKEVHEEFEHKLKTTAMKNEAISVKQ
Transfer_SR00005344-RA	MDTGKHLGKGSKFPAIPEDDKLLRLISMRFCPYGHRVHLALDSKNIPYHTIYCNLIEKPEFLFEKSPLGKVPALELPNEDGCPTILDSLAICEYLDEKYPQYPLLPRDPLKKYNEKTLMQNFGAVMSAQFKVFMMGPSKSPGCVEETTEALAVFDKELASRKTPFFGGDKPAWVDYMIWPWCERLAMIKHLYGEEHDVDYGKLKSLAKWIDSMKEDRAVKLFFLDGETHAKHVKSKHTGKPDYDMLVNA
Transfer_SR00005345-RA	MSAGKHLSKGSTCPKLPDDGQLRLYSMRFCPFAHRVHLVLDAKNIPYHTIFINLTEKPEWLAEKNPLLKVPALELASEPKNPILIESLVICEYLDEKYPKNLLLPKDPLKKAQDKILVERFGPVTGALHKVLLNGPENSPGALTDISQGLDIFEKELGDRKTVYFGGDKPGWVDYMIWPWCERAEMLKFLLGDKYEMDQERFKNLIKWREVMIEDAAVKGSYLDGETHSKFIKTRRTNTPDYDMLVSATKRQRTV
Transfer_SR00009374-RA	MADDAKPAEEAPPAPPAEGEAPPPAEGEPAAPPAEPIKHTYTLFYFNVKALAEPLRYLFAHGGIEYEDVRVTRDEWPALKPTMPMGQMPVLEVDGKRVHQSISMARFLAKTIGLSGSNPWEDLQIDIVVDTINDFRLKIAVVSYEPEDEIKEKKLVTLNTEVIPFYLEKLEQTVKDNDGHLALGKLTWADVYFAGILDYMNYMVKRDLLEAYPGLRALVDSINSIEAIKAWIEKRPQTEV
Transfer_SR00015896-RA	MDFYYLPGSAPCRSVLMTAKAVGVELNLKKLDLMAGEHLKPEFVKINPQHTIPTLVDNGFALWESRAILVYLAEKYGKDDSLYPKCPKKRALINQRLYFDMGTLYQRFAEYYYPQIMAKAPADPEKFKKIEEAFGYLDIFLNGQKYAAGDSLTLADIALVATVSTYEVAKFDISKYPNVAKWYKHCKTVTPGIELNQAGIDEFKKYFA
Transfer_SR00015898-RA	MDFYYLPGSAPCRSVLMTAKALGVELNLKQLNLMAGEHLKPEFVKINPQHTIPTLVDNDFALWESRAIMVYLVEKYGKTDSLYPKCPKKRAVINQRLYFDMGTLYQRFAEYYYPQIFAKQPADPEKFKKMEEAMGFLDIFLNGQAYAAGESLTLADIALVATISTYEVAGFDINKYPNVAKWYKQCKAVTPGIDINQAGANEFKKYFN
Transfer_SR00015987-RA	MSHIAIRSAPRLLSRILTTNSIYTKQINKMSSISSDKPILYSYWRSSCSWRVRIALNLKEIPYDIKPISLIKSGGEQHCNEYREVNPMEQVPALQIDGHTLIESVAIMHYLEETRPQRPLLPQDVHKRAKVREICEIIASGIQPLQNLIVLIHVGEEKKKEWAQHWITRGFRAVEKVLSTSAGKFCVGDEISMADCLLVPQVFNARRFHVDLRPYPIILRIDRELESNPAFRAAHPSNQPDCPPELPNK

## Sheet: 3.CCEs
Maker_SR0002278-RA	MRGLGPLGFLTTEDNVIPGNLGLKDQKLALQWIKKNIHSFGGDPDKILLTGHSAGAASVHLHILKKETEDLVAAAVAISGSALNPWVIQKNVKEKTKTLAGHLNCSYTVGDQLKNCLQKQPIEEITTAVSKMFKFLDNPFNLFGPTIEDENIPGAFLTAEPRRLIESGQIAKVPFMATMTTEEGAYNAGSLLRMDENGKEYIDVLNERWIELAPYLLFNYDDPCDSCKSKVSESLRHMYMNNERFSRTSYLRLQKMFTDVLYMNGILETIKLHRMFGSSPVYGYVYANSHNYGVGNFLSKNEEFEFGATHGDDVVLFLPLIISTNYTAKANDHKIAKYFVKMFETFAIDGKPRFRNIPLTANRNTRILTEFLQIFEGSFCLSPWTGAEDSNFPYREKCF…
Maker_SR0002893-RA	MGELEEKETPPTEPQPHDHHPEAEEPKETDKMLEQKITSTTDDKRRSPTPDKDKKTPNGEEIINIPESAAAGAPPTADDKKTTNNSSNDIENSKLNPVTKEGREVKPKKIPIGGIKMPGFFMKAKPRGDGDGAEGELLEKEPKETSPTIEEKPIKSDDKQRPGLGDRIRSFFVRKPKPSADDTAKSDLTAEAADENNGPPQKRGLLNAIKLPIANMIPKKKTDDDVELGNGPGTKAGLASMETLDDSLKDQDTVDKAPTKKDDDVNKMKGSQEIKTEKCEEEEEVISCFDRIRSYRCSVDDALITLGILLIFVMLVVIGYVLSSDSQTSPPIREGRYIDAVTGCGMNRFRPAQLIEGIEDCWNGTLKAHNATEVCTQMLGNSTIVGVEDCLTLDVITPH…
Maker_SR0003610-RA	MEMKMSVMLKFLFGMVMGTYLKMYRTQNIKAYLGIQYAFAPRFLPPVVDGVEWKGVKNATTFPPDCWQNPKRPIKRHSEIFQNLIKASHSTEETKGYDEECLFVNIFIPDGLPPMQGYAVIAWLHSGDFSYGSATDLDPFQMVFKQKVIVVTIAYRLNIFGFLTTQDGEAPGNFGLMDQAAALFWIRQNIKLFGGNENEITLMGHAAGSISVGLHLTSGEWSQGVFNKAIMMSGSPLADSEIRLPADYSVALDSIANTFGCFRRPTSKLMECLRRIDAKILAENLPFIEWGPIVDEGLSNTSVPFIPDFPKNLIEKGMVRKVPLLTGYTDMEEVLDLVVGEMMDTSITNEVYETMLNDIILTDLSQFDDNDTWCGNVQIVLDAVKYVYKPYPPMKNGAK…
Maker_SR0003860A-RA	MFSKRCNPLSGQLKLFRLIRNNKTQAGMASHIKVRVKQGTIVGGENRLPNGSPYCFFKGVPYAVPPLGDLRFQAPIPLKSFDSPEIDCTVEGDVCSQKDPLSGEQIGSENCLYLNVYTPRRIENTPNEVLPVMVFIHGGGYMFGYGNSNLYKPLYLMQENVVVVTLNYRLGAFGFLCLPDANIPGNAGLKDQRLALQWIKENISQFGGDPQNITLFGESAGASSVHLHFLSASSRKLFHKAIVQSGTANMPWAMKQDLAKKSVLYARVMGCDSDDQKECAKFLRAHTDLSDFWKYMFAILTPEERRRDLPIPFGPTVEEEDVVDALVRKEPLESTNDVKDIDIPMMMGYNSGEGLLMLSNSIKKLDDFDRDLTRLIPRSVNLRADDPESKVLAEKMREF…
Maker_SR0003862-RA	MGFFSRKVEIKQGTVIGGEGVLPNGNPYHFFKGIPYAVPPLGKLRFKAPVPLEKFSVPELECIKEGPNSIQQDRVTGKPFAGSEDCLYLNVFTPKSESNSPLPVMLYIHGGGFTTGSGNSDKHNPLYLLQEGVVVVTFNYRLGVLGFLSLPEAGIPGNAGLKDQASRSKSGNRFDNIFFFFKGSCHEMGEKHFKIQRSQYYTIRQYWRNICPDSYVLKKFQTLFQWSNYAKWGGYNAINDRCLYNEKPSIKWLQFRSERHPEIFTRFQFGSIYFTTDRTFQNHASKACYGRFRSCYNKTNTGSPPTIFSNSSSNGLYKCRRIMSSWQIWKFERLSHLICTSGIVFTKRSQKTSIGIDKGLLFEGRKSQNDLSAKVGGQHVLMAYTSICTSYSISAIAII…
Maker_SR0003863-RA	MVSTKRVDVKQGRVIGGEGVLPNGKRYYYFKGIPYAVPPLGELRFKVPIMVVAPVPLAKFSAPVIKCLKEGPASIQHDTDAGNPFTGSEDCLYLNVYTPECNPSKLLPVMLYIHGGGNVTGNGNSDKHNPLYLMQEEVVVVTFNYRLGVLGFLVLPEANIPGNAGLKDQVLVMKWVRDNISKFNGDPNNITLFGQSSGGSCAHMHLFSENSKKLFHKAIMQSGVATLPFLMNYEGSSKTRSLAKLIGCTSDDPHDILKFLQNFNDLQEFLKPMVCDGRPVFDPPMPTKPVIEEESEEAVITKSLFEAMKDPDSVQVPILIGYTSAEGLSRAAACGENLKDFHNNFHELIPPELIDYLDDEQKMNAAKSIREFYFNDEQIDSKMTYQLSKLLGDFTFSSY…
Maker_SR0004237-RA	MRILSTIFVLLLSVFGNVQAAPNVCIPDMGCLQGTYMPGYQSDKFEAFMGVPYAQPPVGELRFSNPKPIEPWTGVKDASAAKPDCIQKNYLLPSPFVSGEEDCLYLNKEDKKPLPVMVYIFGGGFFAGSANPLIHGPEYFMDTKEVILVTLAYRLGALGFLSTGDANMPGNFGLKDQNLALKWVKSYISEFGGDPDNVTIFGQSAGAVSVHMHILSDLSSGLFARAIVMSGNAGAPYAIPIANPLKQARKQADLLGIPNSQSLSSKDLAMELRKIDAKKIIESGDGFKYWHVDPLTTFRPVVEEPSSEAFLTAMPEDLIASGNYTQVPWMTGMVPYEGAVRGLSILSNENLRKDFNKHFDEFLEKLMEFPATNNVDSKMDSLIRHYFNGVHELNNDTAQ…
Maker_SR0004700A-RA	MTTLWIVFCIAISSWNANAIEVSTSLGAIRGVVLRSRLGEDFNAFRGIRYGKSPVGDLRFKNPQPAEAWKPNTFDATENGPQCPQEPFNSTDNSEDCLRLNVYTKNLSPNILKPVVVYIHPGAFYVFSALSKPFAGPEILMDRDIVLVTIGYRLGVLGFLATGTPDAPGNAGLKDQVLALRWVKEHIHNFGGDPNSVTLLGAGSVSVGFHMMSPMSKGLFHRGIAMSASPIPLNKYPENQLDLAKKQAELVNCPTTNFSDMMQCLRKTPAEEFVRTFLDLYNLGYNMLQVIEEDHGQERFLVEDPTEAFQYGRFQRTPLIVGMTNDEFVRIAKFMLQDKNLTQKLNEEWETQAPIILKYERNTPKSKYVSRVLRREYIQNQTLGSDIPFESFGKLFSDA…
Maker_SR0004700-RC	MTTLWIVFCIAISSWNANAIEVSTSLGAIRGVVLRSRLGEDFNAFRGIRYGKSPVGDLRFKNPQPAEAWKPNTFDATEDGPQCPQEPFNSTDNSEDCLRLNVYTKNLSHNILKPVVVYIHPGAFYVFSALSKSFAGPEFLMDRDVVLVTIGYRLGVLGFLATGTPDAPGNAGLKDQVLALRWVKEHIQNFGGDPNSVTLLGYGAGSVSVGFHMMSPMSKGLFHRGIAMSASPIPLQKYPENQLDLAKKQAELVNCPTTNFSDMMQCLRKTPAEKFVRTFLDLYNLGHYMLQVIEKDHGQERFLVEEPTDVFQEGEFQRTPLIVGMTKDEYLPIAKFMLRDKNLTNKLNEEWETQAPIILKYEKNTPKSKYVSTVLRHEYLQNETLDNDIPFEPLGKLFS…
Maker_SR0007216-RB	MTILWIVFCIAISCWNANAIEVSTSLGAIRGVVLKSRLGQDFNAFRGIRYGKSPVGDLRFKNPQPAEAWKPNTFDATEDGPQCPQEPFNSTDNSEDCLRLNVYTKNLSANILKPVVVYIHPGAFYVFSALSKSFAGPEFLMDRDIVLVTIGYRLGVLGFLATGTSDAPGNAGLKDQVLALRWVKQHIRNFGGDPNSVTILGYSAGSVSVGFHMMSPMSKGLFHRGIAMSASPIPLEKYPENQLDLAKKQAELVNCPSTNFNHMMQCLRKTPAEEFVKTFLDLYNLGYYILQVIEKDHGQERFLVEDPTEAFQEGRFQRTPIIVGMTKDEFVRIAKFMLEDKNLTNKLNEEWETQAPIILKYERNTPKSKYVSTVLRLEYLQNQTLGSDTPFEPFGKLFS…
Maker_SR0009399A-RA	MDLEDCLTMTITTPNVNGSYPVLVYIHGETLYDGRNNEAAPEYLLEKDIVLVSPQYRLGPFGFLSTQTEEIPGNVGVMDIVLALKFIKTFISTFGGDPERITLAGQVGGAAIAHLLTLSPIVQPGLFHQVIYHSGSALNPTFIDENPRDHALEIALRSGCTNLLTHVDLNNCLMSLNPIQLLQGYIEHATDNVRNGGNQFTIGGPSPVLPVHPTVLMAAMKNFSYPAMGGVPRNAGTLLLTQIFQGDFEGRIPDDEYDAFSYINLVLDQIFGDNTKMIMTSFVHREFFDLELLENGTFRTLLPSLVDMAGSLMYKLPVLLALNMNDKHLPDQTFLYSFDYRGEFNRYEDLDEESNTQSPFKAGASLTDESLYLFPHPDHVKYLNPIDTLMAKQMVELWT…
Maker_SR0009399-RA	MCSTSRRSIIKVLALVSIILQFSFAQEHQYVDEYEEYDDRPAGGATYNYPSSTPPNPYGYRPGMNSINPSVRTPQSSSPPSYVPSYYRPPPLPNHSDPNVIALPNTAGYVRGKELRSAFTGKNFKAFLGLKYGSVGSGLGRFQAARQAPISTRIVEATTEPAACPSFPDLLKVEQAERQGINVDDCLTLSVFTPNIYAANPVMIYVHGEMLFDGSAEEAKPEYFLEKDVVLVSVNYRLAPFGFISTQTDDIPGNIALSDLELATKWVQENIAAFGGDPRSVTLFGQSGGATLVHALSLSERVNPVNFDRLILQSGTALNPLFLDEDPLATARAIGREARCPYSSMNSPYELSQCLGRLKTSELLTAFLDHCSHNENRGLYAYGGSKLVIGDKHGYIPMH…
Maker_SR0009400-RA	MASLKFLFVAILLALLVTVRSLEDEKLIKKLEKNKLSQKDKRHVVLDIPNVGKVRGRVSRTLWTEKELYQFIDIKYGESPSGNLRYKPSIPAKPWKDIRKAYTSRRGCPALQDGIDLKLADQKNRDLEDCLFITVNTKSFNSKSPVMVYIHGDFLYEGSSVEAQPGYLLEEDVVLVSIRYRLGPFGFLSTLSEDIPGNAGVSDVILALQWIQKNIAAFGGDPSRVTLFGQVGGAALINVLTMSPAVPKGLFHRVIYQSGSALAPAFITDDPMNGTRSIAKLAGCSNLENTEALNNCLLNLNVSTLLDAFCRHGNMYSNVGGVQFVVGGPSGILPEHPGKLLSSKNYQPYPTMGGTVKNPGTFLLNEIFLHYFNETILDDVFDGYGYINFMISQTNGADP…
Maker_SR0010417-RA	MRVLADIIIAVYLFSSAVVAKGLLGFEKELSDVTLTTALGKIRGTYLTSQAGKNFYAFRGIRYAKPPLGALRFRATSPIEQWNGVFDATVDGPMCPQPALNSSDVSEDCLRLNIYTKELPSEVNLNVKRPVVVFIHPGGFYSLSGQSRNFAGPQYFMDRNIVLVTFNYRLGSLGFLSTGTKEAPGNAGLKDQVLLLRWIKTHISRFGGDPGSVTLLGYGAGAISATLHLVSPMSKNLFHKVIAMSGSSTAQWRVPENQLSLAERQARLLLCPDNKIEHMIECLKQKHYLELANSQGNMFEFGRGNPVLLWKPVVEPKLGQDRFLIEDPVKSFQDDILEDEQLREAFDENFEKVAPVCFLYSSTLARSKNITAELRKYYLGPGSLHPNRSLEGLANLFAD…
Maker_SR0010418-RA	MNPIAHRISLALALSFISSIFCFECKNNTNLIFQKKSTLHQYVGCEFGNWKGGKSIAFKGIRYAKAPINKLRFKDPQPIDEIPAFQDVRIDGHDCPSIISGNSSEDCLFLNVYSKPLDKSRLLPVIVFIHPGGLYLGTGASSFLGPEYLLEKDIIVVTFNYRLGSLGFLNLGTPDIPGNAGFKDQVMALRWVKENIENFGGDRNNITLMGYSAGGLSVCFHLVSPMSQGLFQKAIIMSGSIPPQTEIPRKNQLELARKQALIMGCKESTLSTPNGILECLNQYSGWEISNTLRKMFDFGKDNPIYLWLPVIEEDFGQERFLIEDPYESLRFGRFSKVPVLIGFTNGEFCTSAKDILTSEVLQREFKQDFDRLSPICFMYSENGEGRNITQAVKNKYFDS…
Maker_SR0010492-RA	MRTTRRDCPIQHHSSWNDDDEVLKSFNEIFSSQCLKSSAFKMSSTFCGLSLVKGSLLKTEKGLEVFAFRGIRYAEPPIGEKRFRPPTAIPKWEGVLDATRDGAMCPQHFKWISPLMQISEDCLFLNVYSRNLTKANTPVIAYIHGGSNIGGSGHSLSAFGPRYLLDEDLVLVTLNYRLGPFGFLSLGTPEVPGNYAYLDQVMALQWIHDHIASFGGNPESVTMLGMSAGGMAVSLHMGSPLSKSLFHRAIIMSGSATSELVLDSVKWSQKLAHETSCPMFNPGDVVSCLRELPWETIIKVCDTWELYGIPNMKWGYQVDGYFMPAKLTQLFNHGNFSRMPILTGLSKDEFTFSFHNQENNTGLFNDISLNFDKYASELFMHDLNDAIKVKKLKNFYLGN…
Maker_SR0010602-RA	MQEDEKKLKRNFKYRDKLTEHWAPFLVLASFVILSNVTIVNGQTRDPRFYSRPGVDPPYPYPYPNPGDPDYRTYLFNDRRYGHYPPNGYGNNYPGRNSPGQYPQGMPNEPGFRFDPNNPNSHQTPFPGVLGGWREDLQGKQRRDSITLERDVFVTTNYGQVQGFKVYMYDNPDPKSFYRPYQSPVDRIMGECSVFLGIPYAIPPTFEGRFKPPRTHRGWQLLQAVDFGPACPQPGHTLATFYDVVVVTLNYRLGALGFLSTGDENSPGNYGILDQAMALKWIYDNIEFFNGDRESITLFGPGAGAASAGMLMVAPQTRHIVKKVIAQSGSALADWAFIQDKYRAQNTSRVLGQLLGCSIESSWKLVNCLRTGRSFYELGNAEFPPQVGTFPWAPVLDYN…
Maker_SR0011505-RA	MGARIIVFIILCFTYKQKQASDALFSSDALNGNEISSHDEDSMHIDKNIWNSKSIQTLSMSEADVQVTTKSSPIPKIHFDQAADFQKITESNLPRHLRDIDIAADDDGHLSKGNFNVKDEIATSPQTVHKSHSGGNENEDDDDVIQNDSPMTKYGNSFPYPGTPRRQSPEKLLYTKEITLKQGRLKGIVRTMHPQTGLRDVDQYLGLPYAEAPVGSKRFMPPGTPLPWQGLRIAKHLPSVCPQKIPDISNGSVKMGKGRYEQLIRLLPYLKTESEDCLYLNVYVPSDAGKNFHNRFKVFKFFFFFVHYFFHTDGYDQTHKYPVMVYLHGESFEWNSGNPYDGSVLASYGQVVVVTVNYRLGVLGFMKPGINVSVSNFGLLDQIAALHWIKENIEAFGGD…
Transfer_SR00000230-RA	MLIKLLTYGVGALVFGFLVQNSFVVTANVRVKRIVGGRAAPKPTPDDPVVFSRKYNRAARVEGYRNPDTGIYSFLGIRFADPPIGTNRFTRPRYRRLEGDINATAHGPPCPQPHPQNPNYVVGNEDCLLLNVYTPQMPDETTGLPVYMWIHPGGFRYGSAAQYDAVPLAQEKMIFVPVQYRLGTLGIIGDGSKEFDGNLAMFDMTAALRWVTEYISFFGGDPKQIKVIGHGSGATSAMYLSMSRLPKSGSISGVVAMSGSALSEYAEDKEPVQSVEEIARINGCSTTNETEIVLCLRSKSVEDIVMKDSQVQSERLYGRAMLKGLTGGAGFSPHVEQVDDGRGLPGLITAKPKDSMTNGNFSNIPLLIGVAKQETGNALSPKIINDTFGTANDLLKSLL…
Transfer_SR00004471-RA	MAKFSILLIIPFLACEGFLEDKPVVSLPLGKVVGIRSNGYYEFHNIPYAEPPIGRHRFEPPIPYQQHWDDEQDATQPIISCVNFDKYAPPMGSEDCLYIHVVTPDIVCPTTQFFPVRIQIHGGAYTMGSPDQVESSILVTRGIVIVTMGYRLGPLGFLSTGDSVISGNNGLKDQRLAIKWVKENIKNFCGDDNNILLAGASAGGGASHVHLLQKSTEKYVNAVASHNGAASCPWAIEPDPHYVSRVFADLLNCSDISNSESIKTCLQGKTINELRESTFAMQYYQSNPFTVFSPVVEPLDSEDPFMTQHPRDIMRRGEAANVTWLIGYTEREGSFNSAAFLRPNEENRSVAEIEILNERWEELAPILLFFNRSMSSEDRRNYSKYLKDKYLGEKKFSEE…
Transfer_SR00005715-RA	MATFVNLILLLFCASPTFSISIVSDPIVEIPNGKIRGRDHGHYLSFESIPYAEPPIGENRFEAPKPFKQTWTDVRDATKSPVKCMQWDQYLFREDLLDGEEDCLTINVYTPSIGGNKTYPVLVLIHGGAFMFGTADQSGHDYIMKKQNTVVVKMHYRLGPLGFMSTGDDVISGNFGLKDQLLALEWTKANVAAFNGDPENITAFGFSAGAASVHLQMMNKNFEKIAKRGVSLSGTAFCGWVIMRNPQKRAAALAKHLDCPTDTSLAMKNCLKKKNATDIVRAVQKLQNIGYNPPVVFSPVIESKSVSNAFLSDHPENIIKSGNSAQIPWLASYSKNDGGYNAAELMQRDANGKEMIEILNERWNELAPVNLFFENYVDESKIDAFSNELRQKYLGNKSF…
Transfer_SR00006256-RA	MKTLWIVLCITIISCNANAIKVSTSLGTIRGVVLKSRLGNDFNAFRGIRYGKSPIGDLRFKNPKPVEAWNPNIFDATEDGPQCPQEPFNSTDNSEDCLRLNVYTKNPNLNILQPVVVYIHPGTFHGFSGLSKSFSSPEFLMDRDIVLVTIGYRLGALGFLATGTSDAPGNAGLKDQVLALRWVKQHIQNFGGDPNSVTLLGCAVGFHMMSPMSNGLFHRGIAMSASPIPLEKYPENQLDLAEKQAELVNCTRRNFNDMMQCLRKTPAKEFVKTFPDLYNLGYYMLQVIEIDHGQERFLVEDPTEAFQEGRFQRIPLIVGMTNDELAPIAKSMLQDEHLTKKFNEEWETQAPIILKYEKNTPKSKHISTVLRSEYLQNQNLSSDISFESFGKLFSDAIIG…
Transfer_SR00006909-RA	MASSPKVTVKQGCVVGGTGILPNGNTFNFFKGIPYAEPPVGKLRFKAPVPLERFRTPEIECIQEGNICFQRDKVTGQYTGSEDCLFLNVYTPQIISSGELLPVMVYIHGGAFVSGSGNSESYNPLYLMQESVVVVTMNYRLGPLGFLSFPEGKIPGNAGIKDQRLALQWVQENISQFGGDNKNVTLFGQSAGGLCTHLHVLSKESRKLFHKAIMQSCFANMTWLMESKSSEKTIKLAKALGCHSNDSNEIADFLQQHNNIKDFFDPVYGPLKLDYNDFGFSVPAKPTIEEESSEAVCTKATLESMRNNTTIDIPLIFGYCSADGSAVFPAFTGILEKLEHNLSYFIPDEEGRLQNTKDIESAIKKFYFQGQKIDSTSLINLLTDFYFMSFTAEAAECHL…
Transfer_SR00007631-RA	MLRILYLAFCVALAGTASTDSKVKVTTCLGDIRGIELQSRLGQNFYAFLGIRYAKSPVGDRRFVGPEAVESWKPDILEATTDGPRCPQPAFDSPDNSEDCLRLNVYTKNLSPNASIPVIVYLHPGAFYGFSGQMSAAGPQLLMDRDVVLVTINYRLGTLGFLATGTAEAPGNAGFKDQVLALRWVRDHIRNFGGDPNSVTLLGYSAGSTSIALHMVSPMSKGLFHRGIAMSGSPLMMDKYTEDQLGLARKQAVLLNCSKTDVTSDIVDCLKKAPFEDIVRTFPNMFEIGYHPMLNWRPVIEKDFGQERFLTEDPVKSFEKGDFQRTPLIIGRTKDEFARIAYYNMNDQNITKQINDNWEQVAPIMLNYERNLTDAKDISDLLKATYQIDKPIVANSTDF…
Transfer_SR00007657-RA	MLIFYFAIATCLITAATFTSAIKVSTSLGDISGSILTSRLGQQFYAFRGIRYAQAPTGELRFLNPKPVEPWSPEVFDATQDGPLCHQPFQREYFSLEESEDCLRLNVYTKHLNSTEYKPVIVYIHGGRFIEFSGESQNFAGPQILMDRDIVLVTFNYRLGTLGFMATGTADAPGNAGLKDQVEVLRWVRDHIQNFGGDSSSVTLMGYDAGSISIGLHLVSPMTKGLFHRAIAMSGSALSYWNYPFEQIESARSLAYTLECPIDDLKSMMECVKKGPIVKNSVDEFGQPVVERDFGQERFVVEDPLISFLSGKFHMVPLIIGMTKGEVEDIVKSRLKNLKDIHLSNERFWKEPVSKLFRYSENSTKSKNITDVLRREYLQQHNKSSELIEPLAKMMSDRV…
Transfer_SR00007674-RA	MSTTSISATAVVFILGLTFVASIKVTTKLGDIQGSILKSRLGQDFYAFRGIRYANAPINEFRFKQAQPVSAWKPKTFDATEDGPMCPQIPFNSTDYSEDCLLLNVYTKNVRPRTLKPVIIYLHPGGFYAVSGSSKYFTGPQNIMDREDIVFVTINFRLGTLGFLAVGTADAPGNAGLKDQVLALKWVKEHISKFGGDPNSVTLVGYSAGSFSIGLHMASPMSKGLLHKGITMSASPVSQYSFPMEQIDLAKKQAGLVNCPTDNIDAMVQCLRKTPADEFVRTHYDMFDFGWSPVLNWMPVVEKELGQERFIVEQPLESFQTGNFQRIPLIVGMTKDEFVGIGHDVMANETMLQRMNEEWDRLAPICFLYERNTPRSKEISAVLKKEYLNNKPLKSGDSF…
Transfer_SR00008098-RA	MDLVAGLHWLKQNLPAFGGDSEKIVVMGHGTGAALANILLVSPVSSDLIKRAILVSGSALSPWAIQKFPLLVKRRVAEQTGCHGDLLIDDLAPCLRTKKLADLLSVKIDYPRFLAGFAPFVDGTVISFNRDVLKSLKLPTESAILSASGIEFANFPRQELIFALTSVESYLDLSAQDLEFGLNETRKDRILRTYVRNVFRYHLNEIFAVLKNEYTDWEKPIRNPLSSRDATLSFLSDGHTASHLIKIGYMHNLCGGKSYFLHFKHKTEEEEYPTRSGSVRGEDVPFWFGLPVSPLFPQNYSSHEKNISLIMVRHLGNFARTGDPNNSSDPLSEKMTSEESEAVGRSFKKRSSLDKHLQINNTALVKVFHHGDEKSSTVSSNLNANEYEHKVRRRKRSNL…
Transfer_SR00012552-RA	MRIVAAMRRIVHLCVGACIIFCIAFIVLTVSLISHDSFSDKSSKDERKFNSSQELIESIITFPDLEEETTAWKTLASHPNSIVQSFPARAMEVVHEVVRSLRKESQIVVTTSQGKLRGRFQRFRSGESGGYYSFKGIRYGLPPIGNARFRAPLPERPWYGVRDALREGNSCPHKNMILDTFKGNEDCLFLNVFTQKLPKGDSNPKLPVMVWFHGGGFSFGSGNTFLYGPDFLVAEDIVLVTLNYRLGPLGFLSAGPEAPGNSGLKDQILALKWVRDNIESFGGDPNLVTIFGESAGAASVQFLLLSPLASGLFHRAISESGSALNPWSMAYNTSVRALRLAEATGYIGTDNMSDVIAYLKKVPARKLIEAAPLTLNDNDFRNNIGLPFVPSVEGFWNDP…
Transfer_SR00016407-RA	MRRAMCLFVSIVSVSLIAILLTIISTGAIATHNDELILELPGQGLIQGGRTYTTWTNQTIFQFLGVPFAESPSDDLRFKAPVERLPWKDVRDATKYGQRCPELNTLNTDMPDDQLEDCLNLCVYSKNLTERNPVIFYVYGGGFYNGSSQDHPPNYLLEKDIVLVVTQYRVGALGWLSTQTKEMPGNSPVLDVVLALQWVQRFIHLFGGNPKLVTIVGQSAGATVTGMLMISPRTPEALFNRAIIQSGSILATWATNNKPLELTKKVCSRLCARCEEIAEINRCLRGIDIARLLRNTIDLSFGMTINDVNGVMPDVPIELLKNNPKCIPILTGATKHDGSFVLATFYDGIKAVVGNMSLISPRQFSSKMFEVANEADVTGLAKNLLTTLLYNATELDGND…
Transfer_SR00019003-RA	MKLIDRVIFCVCVTFCINNACTVENKLIVNTSLGKIEGSILKTTKNIDFFAFRGIKYAEAPIGKRRFKPPISVSKWGDQVFDATKDGFICPQPRYTTEEMSEDCLILNVYTHDLNGNKPVMVYIHGGSNFLGTSHSKTECGPELLMNEDIVLVSMNYRLGALGFLSTQNEDARGNYGYLDQVMALQWVQDHISNFGGNPSSVTIFGMSAGGMAVTLHMASPLSKGLFHRAIAMSGSATNHFTVDNQQWTRKLAKLVGCPMYNSKNVVDCLRNISWEKIIDACKTFEPYNFIDLKWNYEVDGHFLLDNPTNVFAKGGFNKVPMMTGITKDELTYFAIYRHANNIGFLNDISLNLEKYAPEVFVFEMDKNAVEKSKKIQKFYLGDKLIQDQPFENFGMIFS…
Transfer_SR00020242-RA	MEVLLKLLIAIGGVGLISAQIGPLVETDLGKIRGSILRTEKNNQFLAFRGIRYAEAPTGPKRFTPPVAVKNWTGELDATQDGFMCPQMGKQLELLSEDCLILNVYTKNLTANQSVLVYMHGGANIYGGSHSTQAVGPEYLMESDIVVVTMNFRLGALGYLSTRSKEAPGNYGYLDQLMVLHWVHDHISKFGGNPGSVTIMGMSSGAMAVTLHMASPLSQGLFHRAIAMSGSSTNENIVDSLKWTQKLAHDTSCPMFNPNDTLDCLRKLPWQTIVSVSESWQPYNLLSLRWREEIDGHFLTKNPTEAFAQGNFSRVPLMTGISKDEFTYLILSQENNTGLLNDISLNFEKYAPELFIHNFDDGKVKRAARIRNFYLGNKTIAEQDLANFGTIFADALINH…
Transfer_SR00020243-RA	MIVIPQLVILVAFFASQVSAQLNPIVNTSLGKIKGTTLKSETGLDFFAFRGIRYAEAPVGDKRFKAPIASNKSWDGEYDATRDGYMCPQTGQSANLMSEDCLVLNVYTRNMTGNLPVIVFIHGGSDKDSGSHSELEVGPEYLMEAEIVLVSMNYRLGALGFLSTRTADAPGNFGFLDQLMAMQWVQQHVDKFGGNPKSVTLMGFSAGGMAVTLHVASPLSRGLFNRAIAMSGSATNEQAIDNLHWTRKLAHETSCPMYNPEDMLSCLRKLSWEKIVEVSKRWDLYFADMKWNYEVDGHFLKMKPSQHFAKGNFSHVPILTGLSKDEFDFQSAGLESNPALLSDIDLNLEKYAREIFQHDFGASPSKKLQKLRNFYFKNETISKPNLDRLGEALSDSFIN…
Transfer_SR00021021-RA	MLFKAVWLINIIVIVLANNELIVETTLGKVKGSILKTVRNNELISFRGIRYADAPIGDKRFKAPKKVLTWGKNILDATKDGLQCPQPFIEKELISEDCLFLNVYTRNLRGNKPVLVYIHGGSNYLGSSNSESDVGPDYLMDNDIVLVSLNYRLGALGFLSTKTAEAPGNYGYLDQIMALQWVQDHVLCFGGNPELVTIAGQSSGGTAVTLHLASPLSKGLFHRAIVMSGSYTNHYHLNSLIWTRKIASELACPLYNPQDVITCLRNVTWEKLIEVRGTLELYGFSDEEWNYEVDGYFLYDTPTNLFAKGDFHKVPIMAGITKDELTYFFDDQRNNTGLLNDISINFDKYAPHLFIFDPNNVAASIEIQKFYLNGRKIQNQPLTNFGIIFSDSLINHGMH…
Transfer_SR00021024-RA	MIVQIFVFLIIIIGFASSQNEPIVETKMGKAVGSVLKTVHGVEFKAFRGIRYGQAPVGEKRFKATERIRSWGTKTYDATKDGFKCPQPFLAKELISEDCLFLNVFTKDLYQKWPVIVHIHGGANYFGSSDSETEVGPEYLMDNDVVLVTLNYRLGALGFLSTKSKEAPGNYGYLDQVSALQWVRENIAEFGGNPNLVTLSGQSSGGVAVTLHMASPLSKGLFQRAIIMSGSSTNHFYVDSIAWTRRLAMALACPIYNPEDSINCLRNATWENIIEVRGILEVYGFSDIQWNFEVDGHFLLDTPTNVFEKGQFNKVDMIAGITKDELTYLYKNQESNTGLLNDISLNFEKYAPSLFIFNPKENAEDKSKQIEKFYLKCKNILHQPFTNFGVIFSDAIINH…
Transfer_SR00022218-RA	MDIEFSYLGLIRMGFKLLVHKIQQHRLATSEVNLIGTTHGKVKGVKRMSVYNDSYHSFENIPFAKPPIGDLRFKAPQPCEPWEGIRDCSSAGKKPLQEHILFGKVEGSEDCLYLNIYVKKLLSEKPLPVMVCIYGGAFQVGEASRDIYSPDYFMKEDVILVVLSYRLGPLGFISFKDPSLDVPGNAALKDIVMALRWIKNNIEYFNGDANNITLFGESAGGVSTHYMMITNQTKGLFNKAIVQSGSVLASWAVTPYSSYPFRLAKAAGYKGEENEKQIYDFLMKCNAKKIISAQKNLLTEEERRDRLIFVFGPVIEPYITEHCVVPKHPREMLKTAWSNSIPLIIGGCSFEGLFNYTETRKSPERLNTLGDCQHIVPPELCPDRTTDICKELGVKLKKA…
Transfer_SR00022219-RA	MNAKVSFGGKLSFRYRSLEHKINQYRNNTGETVVTETEYGKVKGAKRRSLYDKLYFSFEKIPYAEPPVGNLRFKAPQPPKPWNEILDCTQMNPKPMQTHIILDHVDGTEDCLYLNVYTNDLQPAKPRPVMVWIYGGAFILGEANRDWYAPDLLMNKDIILVTINYRLNVFGFLSLKDPKLDVPGNAGLKDQVLALKWIKNNCARFGGDPGNITVFGESAGGASTHYMCLTEKTKGLFHRAILMSGNALAPWAAVKQSDYPFRLAKYCGFTGENIEKDVLEYLQKVKACNLVVDDTKLLTPEEQMNGVFFCFGPTVEPYSSEHCVVPKEPFEMMESAWSNNIPVITGYTSSEGLLFYPSLSKEPNALKGLETCAFMVPSELIDRRDSEKCLELGKRIKGA…
Transfer_SR00022222-RA	MAAFNISFADQLKLAFRYAKFKLRQSRHRTNEMVECTTTYGTIRGLKWHSVYGGDYLSFEGIPYAKPPIGELRFRAPKEPEPWTGVRKCTKVRAKPTQMNIVIGMVQGSEDCLYLNVFTKNLNPEKPLPVLVWIYGGAFQLGEASRDIYSPDYIMQENVMLVTISYRLGPMGFMSFSDPEIGIPGNAALKDQIMALKWVKNNCQFFGGDPTNITVFGESAGGCSAHYMMLTEQTKGLFHKAIVMSGSVVAPWANIPPRDWSYRLAKSAGYTGEKNDREVCEFLTKIKANEMYKHSEKLITKEERQERIPFCFGPVVEPYLSDECVIPKNPVEMMREAWGNTIPMIIGGNSFEGLLMFSEARKYPDMVEELGNCEKVVPIDAPLTPEERKNFGLKIKEVY…
Transfer_SR00022226-RA	MAALGFFDMVKLTFKVIGYKIQQSSLTTNETIEVLTNKGPIKGIKRISIYGDSYLSFENIPFAKPPLGELRFKAPQPPDPWTDVKDCTQPCEKPLQENFVFTKYKGSEDCLYLNVFTKNVTPEKPAPVMVWIYGGGFQIGEASRDLYGPDYLMTKDVVYVSITYRLGPFGFLSLKDPKLNVPGNAGLKDQVLGLKWVKENIFRFGGDPENITLFGESAGGASTHLLMLSNQTKGLFHKAIVQSGSALCHWAMPPVNNWPFRLAVSLGFTGADEDEAVFEFLSKTSGPDIVKAAVRITNKDEKRNRILFAFAPTIEPYESDDCIISKEPLELMKTTWSNDIPLLIGGNSHEGLLFMPEIRRRPITLDEVKNCEYLVPNELGLNRSSEKCSELGLRIKRAH…
Transfer_SR00022478-RA	MFVSNYKRLCLIKMSKITVMPLSCFFLLLLFKTNWVNCVIDRLVVQTTSGPIRGRSVMVMGREIHVYTGIPYAKSPVEDLRFRKPVPTDPWHGVLDATTLPATCVQERYEYFPGFSGEEIWNPNTNVSEDCLYINVWAPARTRLRHGRGTNSGEHPSRADEFNEKHQNFSGVPMLIWIYGGGFMTGSATLDIYNAEIMSAVGSVIVASFQYRVGAFGFLHLAPLMPGYEDEAPGNVGLWDQALAIRWLKENAVAFGGNPDWLTLFGESAGSSSVNAQLISPVTKGTVKRGMMQSGTINAPWSHMTSEKAVEIGKALINDCNCNASLLMEAPLNVMACMRAVDAKTISVQQWNSYSGILSFPSAPTIDGAFLPSDPMTLLEGTNLEGYTIMMGNVRDEGT…
Transfer_SR00026855-RA	MSYWTNFAKTGNPKAPWKGTFINLHALEWDRYDLDWPEFNKRNQCYINIGIPPSIGYKYRNEYMNYWNKELPNELNQIGNIQQQPYIHTFSNLPTQISRGGTSLYPNEVVTGHMSKFPPTHREHNTDDPQRTLRLLLQKSYPSTMSKETADNMYNAPPTFGIVHREKSDEDSTSTIPTLVSTQSGDAKETVKSESTMHLLIGLIAVFIVLNVIIYSTFLIQKKKKHTIMGRKLGILSYDGTTDDELKRSKNNDGEDSYVLDMVRKSNTYEAVKTQHSPINGYKITRQLSCSTMDAHAKVCDWMSQENASKGSPKSSKRSSSPTFSFRSKNFFKKSQKVSVAIDATPQARSNSILRQEPIEVTKFKTDNPRNLIICQEVDVDTDLITEESIDCCYFNTSA…

## Sheet: 4.ABCs
Maker_SR0000443-RA	MSDVIGALLPIVVFISYLYSSTWLIKFITAEKEKQLKEVMKMMGLQNWLHWTAWFIQAFLAMGISIFFVCIILSFKWSNDVPILKHSSFTAVLFFFLVYTAATVTFCLMVATFFSKANTAASVSSLIWFVTFVPYLVFNTNEFAFPATMKLLWSLFCNTAMGVGIHMIIDLEQAGPGFQWSMMFTRIRPDDSMTMGHLMLVMIASCFLNLIICLYVEQIHPGEFGVPKKWYFPFTKTFWCGEHEYFENEDSCSGSWRQNTEAFEAEPIGKRIGLEVKNLCKSFGQSKAVKGVSLNMFEDQITVLLGHNGAGKTTTISMLTGMFPPTSGTAIVNGCDIRTNMDGARASLGICPQHNILFDDLTVKQHLIFYSRLKGLKGNELETEVTNYMRKIELENKAN…
Maker_SR0001216-RA	MSSAKKRDAQRKKDARNKKIAQVSSSSKGITKVNGTNGTNGSVELTEEELLCAKLEEEARISAEARSCTGSLAVHPRSRDVKIANFSITFFGSELLQDTMLELNCGRRYGLIGLNGCGKSSLLSVLGNREVPIPDHIDIFHLTREIPASTKSALQCVMEVDEERIKLEKLAEELASSEDDDAQEQLIDIYERLDDMAADCAEAKAARILHGLGFDKDMQAKQAKDFSGGWRMRIALARALFVKPHLLLLDEPTNHLDLEACVWLEQELKEYKRILVLISHSQDFLNGVCTNIVHLTKKRLKYYTGNYEAFVRTRMELLENQMKQYNWEQDQISHMKNYIARFGHGSAKLARQAQSKEKTLAKMVAQGLTEKVTDDKILNFYFPSCGTVPPPVIMVQNVS…
Maker_SR0003479B-RA	MLVDRTLATGTSSKTYFLPLLGGGKTLTNATLEENNIELYYDSISYGALLTITSVIMLFSGIYSVDVFNIIALKQVTRMRMKLFRAIMRQDISWHDVTTQQNFAQNMTDDIEKIRDGISEKVAHFLYLIIGFVITVGISFAYGWKLTLAVSVYIPIVIVMNYFVTKYQSRLTTLEQDSYSNAGNLVEEILSSIRTVVSFAGEKKESGRYDNFLIPARKASQKKGAFSGFSDGVLKALLFISCAGAFWYGVNLILADRDKEDKEYTPAILMIAFFGIIVGADNIARTSPFLESFATARACGRKIFDVIDSKSKIDPMSTDGKILNYGLRGEIEFRDVFFRYPSRQDIIVHRGLNFKVREGQTIALVGSSGCGKSTCIQLLQRFYDPVFGQVLLDDLDIRK…
Maker_SR0003479C-RA	MFVDRNLGFGTSSTTIALPLFGGGKILTNATKEENMAELRNDSWAFGYILTIISIILFVSGVIFVDILNIVALRITGKMRIKFFEATIRKDIGWHDISENQNFAVRVTDNMEKIRDGISEKLGHFANLALGCVIVIVISFVYGWKLTLAISAYIPLVLFSNFFVAKYQSKLTIREQDSYVIAGGLAEEIISAIRTVVAFGGEKLESERFDKLLLPAHKANKLKGVFTGVGDAITRSMLFFAVASAFYYGVILVLDDRGSTDPEYTPAVLMIAFFGILVGADNIARCSPFLDNFASAIASAAPIYEVIDSNTNIDPMSSDGKILNYGLKGDIEFQDVFFRYPSREDVIVLRGLNLKVQAGQTVALVGHSGCGKSTCIQLLQRFYDPVFGNVILDQLDVRK…
Maker_SR0005513-RA	MAASVARVQTEFVGNNLKNGALNHGSQNNICNGSISGNHILAPKVQNNSPNGQKKGTVTLTHLPQRPPVDIEFVDISYSVSEGRRRGFKTILKGVSGKFRNGELTAIMGPSGAGKSTLMNILAGYKTSQLSGSVLINGKDRNLRRFRKLSCYIMQDDILIANLTVAEAMMVAANLKLGKDMNHHAKKVVVKEILQTIGLSESVNTKTYNLSGGQRKRLSIALELVNNPPVMFFDEPTSGLDSSTCFQLISLLKSLARGGRTIVCTIHQPSARLFEKFDHLYMLAEGQSIYEGKVRGLVPFLGSLGFDCPSYHNPADYVMEVACGEYGEAVHKLVLAVKNGKCKKYSQKEYAIDLVNNKNISNDLIKGNVPPSTQSPAIGNDALCELKPPNQQSQQQQCE…
Maker_SR0005658B-RA	MLAAREAFLAGIEITPKNLGAKDDNDISKTKFETKTSVQRSTQTNETYLNAENKQTVPNNFTNYESQSNLPPREPIDMEFKNLSLTVNLGFRKGNKEILHDVCGKFPGNQLIAIMGPSGAGKSTLLDALSGFKTTGVMLAAREAFLAGIEITPKNRNKEILHDVCGKFPGNQLIAIMGPSGAGKSTLLDALSGFKTTGVDGSILLNGRRRDLTSFRRMSCYITQDDRLQPLLTVYENMMIAAGLKFGHSISSHEKAEKIESILLMLGLYQHDLTLTKRLSGGQKKRLSIAMELLNNPTIMFLDEPTTGLDSSSCSRVLQMLKKLAGQGRTIICTIHQPTAKLFEEFNQVYVLSTGYCVYQGSTKNLVPFLQTVRLPCPMYHNPADYSRFLKLSYHIVFL…
Maker_SR0006167-RA	MEKETDFMTRFCGSEFWNLNRTWYTEDPDFTPCFEQTVLVWVPCAFLWLFMFLELYYLRASLDRNIPWNFKNLSKVILHGALLVLCVVDFVTALSVKANTTNVIYPVHIWGPVIKFATFLIATMLVVLNRKFGVQTSGTLFMFWFFIVLFGLPQCRTEIRDYSDRSSGPLQGTGIDEEDNWANYRFISFMIYYALSIAIFIFNFFSDNMPSETKYTRSKKEIPEMSASFLSRITYSWFDKMAWLGYRKPLEESDLWDLRPQESSKEVMPIFAKYWNRNVRKNYSVENRAPKAQFSNGNVTFENPHGSKTKGFASIMPPIVKSFGGIFLFGSCLKLVSDMLTFASPQILGWIINYVENKSHKENEPDAEWKGIFYAVLLFVCAAMQTFFLGQYFQKMYIV…
Maker_SR0006168-RA	MATDAGPMEKFCGSEFWNLNVTWNTEDPDFTPCFEQTVLVWFPCGFLWIFMFLELYYLRASLDKNIPWNFKNISKIVLLVALHALCVVDVVKAVMLKDSESNLIFPVDIWTPVIKFVTFAIAVMFVFLNRKYGVQTSGTFFMFWFFLVLCAIPQFRTELRDYSDRHDHSSIYTEAQMSWADYKFISFMIFFGLSLLLFLLNCFADNLPRETKYNRTPKEIPEVSASFLSRLTFSWFDKMAWLGYRRPLEQKDLWELRPQDGSKEVMPLFAKHWNNNEKPAEGKIVLENPSGGAKTDKLASVMGPIVKSFGGIFLFGSLLKLVCDLLSFASPQILSLIITYTETKADGAKVSEPVWRGIFYAILLFLNASVQTFFSAQYFQKMYTVGLRTRTALVNAIYR…
Maker_SR0006608-RA	MVQNMEMSNFNSKKMSREERRYSVPHGPNTPLPPAASEDLHAWSIYRQNLNSDFTDSALGSSDKSPLPYGNFQLRDTTVQSILNHPRYGPKSPLGSNMYTYLKFGLPRVFPPNAGSQRSHRPGPGPGRGRINRGFRDSSGPPAGSSGYDSSDNETTRSRVPPNLRKYRSESDFRAIGGIPTPRPDSRAQGVPMAALRQANSRASIAVGNHINSHYIPNGKHYGNRSHSEADLLGTEIGNYADYDSRTYTTNRSRMENHHHNHNQNYNQIHNQHNSHHSHTMSGHRKHSTLGLVYPNIQVHCLDVNPGLRGVSLQAKAGDLFAIMATSQPEGTALTECLAGLRERISGEVLVNGQQINRRGLRELCSYVPALDNSSLDPRMSVQCTLNFHAALRGPIDRS…
Maker_SR0006738-RA	MEKTPATSNFKKFLLLLHKNSLLVWHRKCELLVELFLPAIICLLLVPIRLWKIPKQMEEKTYTKQFDLDHWDHKRWKFDKQPLFYYIYDHFVFIPENPCYEQITKGVAKKFGKEYGSWNATVHLARTKTLRALYIHFDASTDCNKTLNYKLRLWSNLKRKNIVESNLTWMTNQLFIEFDPPGPRNLKVEDGGTPVGYVREMFVNIQHAIAEEFFKLSAQKFKNQALPKVVFQRFPYPKYKQDEVILQLAHLLPVMIMLGYMHPMMIIVRQITTERGKQLKEVMTMSGLQNWLQWTAWFVRAFVIMALSSFLVTKVLTAKWGENEYAILHDSSFAEVYFFLLAYVASSITFCFMIATMFSKAFTAVVVTVVLWFITFLPFMPYSILARYYVNMTLFAKLM…
Maker_SR0006742-RA	MTNQLFVEFDLPGPRNPKVEDGGTPVGYLRELFPNMQHAIAEAFFKLSAQKFKDQALPKVVFQRFPYPKYKHDEVILQLAHLLPFMIMLGYMHPMMIIVRQVTTERGKQLKEVMTMSGLQNWLQWTAWFVRAFVIMALSSFLVTKVLTAKWGENEYAILHDSSFTEVYFFLLAYVVTSITFCFMIATMFSKAYTAVVVTVVLWFITFLPFMPYSILAGYYVNMTLFAKLMWLLIPNTALNFGNQVIMGFEIRDEGLNRSNMFDPLNSDDSLSMGLIIIAMLVSSGIYMLISLYLEQVYYVGNFGVAKKWNFPFEKEVRFKKRVTNSGSIERKSPEAFESEPVGRPIGIQIIYLEMSYGNRQVVTELSMNMYEDQITVLLGHNGDGKTKTISMMTGMIPP…
Maker_SR0008536A-RA	MSAFTGILRREFPAMDDELKDYVEGVLCGSLDDFESCDDIYEAVGDILQSISAEKTEDNIRELCDQFFNIIKMKSTNETNKVLNAPVNIAEMAATMEATDKDVHSIWVVNKDAGNKVDTKKLEKAEAKLQQKLEKRMDNKTVPQAQAKLQTATASQVISKKSNKMEQKGTNRSMDIKIENFDLAFGDKVLLQNANLLLSFGRRYGLVGRNGLGKTTLLRMISDRQLAIPSHISVLHVEQEVVGDDTPAVDSVLECDFERTRLLKREKEILAELNTGTQDAGLSAELSEVYIQLQNIEADKAVSKASVILKGLGFTTEMQSNPTKSFSGGWRMRLALARALFSRPDLLLLDEPTNMLDIKAIIWLENYLQTWPTTLLVVSHDRNFLDVVPTDIIHLHSQI…
Maker_SR0010288A-RA	MKDGCMQAAGSYKDIEVNHPKIVDRWKTIITMNEKDKFWGGRTASERWKLFKNITKLGLQRQHTTNENEHNFPCLPSTAYYCKPKKRSSFYGSRHLIYDMPIPIDECQNDDVIIRRRRTNDDFAPNSSHGQQRRRRAAHSFELKRYSSLHNKKEILRVHSLQPELRELEQIPPSPPSSTSSSSFAFPERDISGDGCEPKRLRGVADDLDLKSTKIGFQQFLHRMSSRKSNQPKTPSAKSHHHHQIQLQHHHRPVSATNSIVSISEEPIPLKMTAEDDGSTQTSWVDDDVDMAKDINPESLTDANDNNIQVSSSLSDSDERKYGEIPVEIYMLYLKSAGFPIVLLFFTTALIWQCLRVYTDVWLQQWTDATPPAYTTTTTTTTINSSSIDAKLESKTTVK…
Maker_SR0010288-RA	MFTLGGLLKFFGDLSALVGPISIDLIVSYVEQLYKSQQQSALLQQVASMKKQSDPTFLQIANQSGFHIADISARRRPFDQFHSYAKNSYSLNHDGDLENVFRLSLSKAEDIVIYYPCWADLLSNGWAIAWCVFVASLAQGTLSQASTHILNMTGIRIKTSLQGLIYRKTLLLSSSSSSSSSSSSSASCCSPVAEKPNDNNDGDGKFEQVNKQRLSKDTTTIPKTTTTNMMSGKKENITKAISCENDVGAVTNLMSEDTLNIMSFFWIAHYVWAIPLKIGVVIYLLYLQLGESAIIGSFVCILTLTPLQFLIGKAMSNNSETVAKWTDERLKRTHDVFCGIKIIKLNAWERVFGDKIQAARNTELKFLNRDSFYWTLMTFLTHASSVLITFVTLAVYVNM…
Maker_SR0011362-RA	MFDLLKEEEEVFDAPGASNLLCSGGKIVFSNVTFGYSPEKIVLRNVNFTVNSGKTVAIVGPSGAGKSTIVRLLFRFYDVMQGAIMVDGQNIKLVKQSTLRECIGVVPQDTVLFNNTIFYNIEYGKIGSTSNEVFEAARNADMHERIQSFPDGYETKVGERGLRLSGGEKQRVAIARTLLKAPVIVLLDEATSALDTHTERNIQAALAKVCTNRTTIIIAHRLSTVIHADEILVLQDGGIVERGRHDDLVQRNGVYAGMWNQQLQNLEAATTSSDSETDKTERVTSGGSVVKATSGHSQK
Maker_SR0012068-RA	MSKEPPTNNLKFLLLLHKNWILLWHCKFLLLVELFFPAMICLLLVPVRLYKIPTDKNATTYDSKISIDNFGAQEYVDYPKHPFHWHAYTWLVYQPENPCYEKIVNRTAGMLKLGYNLAGPDFDKTLGLRYQVEVRIIFDKLSDCKKNLKYTIRYWRMILGQHNVEFNRTWMTNQLFIEFDPMGPRNPNLANGGIPSAYFRDSFLGLQHAIAKSFFEMSTQKFKDQALPTVEFQRFPYQKYKHDEVMFELAYLLPWIIMFGYMHTMMFIVWQVTKERGKQLKEIMIMSGLPNWMQWTAWFVRALVIMGLSALLVAIVLTAKWANDKYAILNNSSITAVYFFLLTYIATSITFCFMLATMFSKASTAVVVAVVVWFVTFLPFIPYSILADYYVNMTFLAKL…
Maker_SR0013312-RA	MMMLYCPPNVTLSQVWVNHGISHCFMETVGSSTIAGFILLFGTIQLIMYKKYATRITDLSQISHSRLYNLQLFLLGFFPLLFVARFLLMHYVYDKGDIYGYMILTLVLTCFAYPYSICLVVKERYYQFPSVPTRGHGLVLLLFWTLGLINENLTFVNMRQEDWWFNLKSTKDKIEMGLFVTRYVLSLLIFVLGLKAPGLSWPYSRNGNDQEELVNPEVNRSAFHNAWKKLGRLFPYLWPKKDTWLQLAVITCIILLIGGRVIRLFLPIYRKKLVDSLTDEPVTFRWDFVLIFVALSFLQGGGTGTMGLLNNLRSFLWIRVQQYTTREIEVDLFRHLHNLSLRWHLQRKTGEVLRVMDRGTDSINNLLNYIIFSITPTIVDILVAVVFFVYAFNWYFGLI…
Transfer_SR00000651-RA	METRQKTTNFEKFRLLLWKNWVITWNHKVQLLIELFLPVIFALLLVLVRALVTPDDVGVTIFKDPLEIDNLDILQSLFGRLAILRKIKRKTFQNSQTLYALHLEKIKYHLAYTPNTTCYAEVIKAAADSLGLTYSGYGSAKEMEDVVLRETYLAGIQFDDAEDCRKNLVYQIRFPSELRTSESIAGIVLTWMTNLLFLPFDPIGPRNPKDEDGGNPVGYLREGFLPVQNAISSAFLKLSTQNFKDQPLPYVMLQRYPYPPYRNDVLLTGLASMMSIIIVLSYIYPVTYTVKYITMEKERQLKEVMKIMGLPNWLHWAAWFVKAFLMMGFSSLIITIILTTRWKDDVAVLTNSSFTAVYFFFLVFTVTAITLSFMLATMFSKASTAAAVTGLVWFTMYIP…
Transfer_SR00000656-RA	MSTRNLDKLLLLLWKNWLLNWRHKRQLFVELLLPSIFSFLLFRSQEAPFKHDKYVYSKVFPVNSFDLMRFHGYDNTTTFHLPYSPKTKVFENLIQEAAASLNLTYKGYANSTELENALLKEKYLAGIEFDDSLVNSEKLPIQLNYRIRFPTEYNGNLFLPIAMSGPRNPMEEDGGLPVGYLRKGLLPIQNAISMTFLKQSKPELSNALPDIFLQRFPYPEFMYRYSNNGRNNLFPYVIVISFMYSSTWLVKFITVEKEKQLKEIMKMMGLKNWLHWTAWFLQGFSTMGISVFLVVCFLTVNLNIHAREVPLFYNSSFGPLLLFFLVYTAATVTFCLMVGVFFSKGNTAASVGGLLWIATFIPYTYRSVLPASWKLAWSLLCNTGMGLGVNIILDLQVMG…
Transfer_SR00000673-RA	MKLLRTAFSVPQIKALLKKDVLVRIRQPWMTVVQFVWPCLIFLLLYTIRDRFGAVKVDDCQFPTRQLPTKSNVLPFFHSYICSIENRCLSTEEYEEYSKLENAPMKPIIDIAQIFIKDDSLYNTIVDLPKKANFISAVTSLVTNKYFNDIRNQIGKVVEAVPAVEKMLGGNFDIKRLFSDRSTFVRAGKLLCGHPFPSTDVIPIASDVLYSEDFSEVNDDELNAMPTNYCKRLYLDVTSSNFGKLTWTTIKPIIHGKILYSPVTEDTQSIVKYSNTTFEELNRLVNLAYALDESLIKLRNDTQFQAKFDSILELAKSPVVKSLIGDSIDIAEIEAVMIGIRTDPIVFEVIHTIKNLLECFSIDRFIGVQTEDELQKMAFEMNKQRLFYAGIHFNKTEGK…
Transfer_SR00001993-RA	MAPALSKLAQHQSAIVGITGISAALWIIAHGKMSNKKRKPRPEDQILYTINEKKDKRAPKAHVNSLFFKQLRQLLPILIPGVWSVESGLLVLIAGALVARSISDIYMIQTATVVESTIIGMNKTKFKTALIKYLAALPMISVVTNVLKWSLGELKLRFRSNLTQHLYKEYLTGYTYYKMSNLDNRIANADQLLTTDIDKFCESATDLYSNISKPILDIIIYVYRLTMNLGGQTPSILMVYLLFAGVLLTRLRRPTGRLTVEEQKLEGEFRYVNSRLITNSEEVAFYQGNNREKLTLLASFSKLRAHLRKFLEFRVSMGIIDNIVGKYFASVVGFYAVSLPFFTENHPLLSGGTSATRLQAYYTYGRMLVKLAEAIGRLVLAGREMSRLAGFTARVTELI…
Transfer_SR00005054-RA	MARIVHLVNFCGRNKFLFSNKFKTSAKIDICDKYLKLFACSPRIHYLQYSTAAAGIPRDDKQKPKANTLLADKQVLGGIFDKKPPKAGPWQHIRYCFHVGVSAVGQESLGKIDAQPVSSTDMIRAMMAYIWPKDDALVRKRVGISLGLLVGSKIINVCVPFCFKGAVDALGMLNMDSAPETVLSVSTALLIGYGAARAGAAGFNELRNAVFAKVAHHSIRKIATNVFLHLHNLDLGFHLSKQTGALSKTIDRGSRGINFVLTAMVFNIVPTIFELALVSSILGLKCGAAFAGISMGCVGIYAAFTLAVTQWRTQFRVYMNQAENEAGNKAVDSLINYETVKYFNNEHYETKRYSDVLKKYEEASLKTSSSLALLNFGQNAIFSTALTAIMVLAAREIAQ…
Transfer_SR00005292-RA	MSRNKEKEETDKQTRIAIVSDDKCKPKRCRQECKKSCPVVRMGKLCIEVSPISKIASLSEELCIGCGICVKKCPFDAITIINVPSNLEKHTTHRYSKNSFKLHRLPIPRPGEVLGLVGQNGIGKSTALKILAGKQKPNLGRYVDPPDWAEILAYFRGSELQNYFTKILEDNLKALIKPQYVDQIPKAVRGSVAALLDRKDELKNQTEICEMLDLTHIRDRDVAALSGGELQRFAIAIVCIQNGDILMFDEPSSYLDVKQRLNAAVTIRSLINADKFIIVVEHDLSVLDYLSDFICCLYGIPGCYGVVTMPFSVREGINIFLDGFVPTENMRFRTESLTFKVSESATEEEIKRMNHYVYPKMSKTLGSFRLAVQEGHFSDSEILVLLGENGTGKTTFIRM…
Transfer_SR00006876-RA	MTRRSIEIQQPPSSKTISVLPEQGDFYRKCEDGCPEGSTSSSSSTQNKVDRVSYFALFRYSTIGERLLVLFGIILASLGSVGVPYSVVIYGEFTSLLIDRTTGIGTSSPTFILNIFGGGKVLTNASREENIQAMKDDSLAFGIGSVVGGVLEWVLLAIALDIMNSVALKQIRRIRTLFLKSILRQDMSWYDTTSGNNFASKMTEDLEKLKEGIGEKVAIFVFLIMTFITSIAASFLYGWELTLVVITCCPFIIISTALVAKIQSSLTVKELKAYSIAGAVAEEVFSGIRTVLAFSGERKESQRYNKLLVPAENTGRRKGLYSGIGAGVMWFIIYCSYAVAMWYGVQLIIEDRDKEIRGYTPAVLIIVLFGVIMGAQNLGFSSPHLEAFAIAKGAAQSIY…
Transfer_SR00008410-RA	MLRLLVSQCNGKSDILSRGIYNLPKFRFNANTAKDSTKLHRNFHHNKNGIEPLKVPSKPSSNVSGLVKARNLLLGAGGVSIGLAARCKSNWFVQCESNRLAGVLQKTLQQDDSKFDWKKFWEYLQPYLLELLGAVFAALAVAFINIKIPNLLGDLVNTLAKYANTFVKDPLSNTFLRDIKTPAANLLGLYILQSGFTFVYIFLLSRIGERMATKIRQDLFKQILIQDIAFFDENRTGELVNRLTADVQDFKASFKQFVAQGLRSVAQLIGGSISLVIISPHMAAIALAAVPAVVMFMTLLGRTLRSLSKKSQAQSERATSVCEEALSNVRTVRSSAGEYREIDLFEKETDKAAIMAQQLGYGIAIFQGLTNFFLNGLVLTTLFLGGHLMSTESLSPGQL…
Transfer_SR00008579-RA	MERRQTASNFEKFRLLLWKNLVLTWRKKNEILQYFILSLALCLVLVKERTGEIPQEMNVTIYDKPIPINNLDLLKGTITAEYAGNLKYHLVYTPIIPCYEEIVKRAADSLGLTYSSYSSPKKMQDALENGEFLAGIQFDYSKNCHENLNYQIRFPSLLRTSTRNESTWMTNQLFVRDDPNGPRNRDNEDGGVPVGYLREGFLPVQHAISTAFLSLSAINFKDQELPKVVLQRFPYPKYKNDESILNMAEIVPLAIMFNYMYIVMNTVIYIVAEKEKQLKEVMKIMGFPNWLHWAAWFVQAFLTMGLSSLILTIILTTKWGGKDSLAILTNSSFTAVYSFFLAFAVTSITFSFLLASMFMKTSIAMVATSDIYLITYYPYYFCLKKYEEITLLTKLIWSL…
Transfer_SR00010342-RA	MELTTRSVITKFETSQSIVQSSNQILDSLPKKSSITTKFVCESKDKLKRLNIEFEDIKYVVRTGFFKRENKTIIKGLTGKFLSGELSAIVGPSGAGKSSLLNILSGYELIGASGNVLVNGTKRNVDIFRTNLSFIKQDNDLQPFLTVSEAMHFSANLKCGNSLSGNEKKQRVQDILHSVDIYKIRKNSTGKLSGGEKKRLAIALELVNNPPVLILDEPTTGLDSSVANQCISLLKKLANDGRTIVCTIHQPSGLAIEMFDVLYAIADGKCIYSGGTRNLVPFLAQLDLKCPEIYNPVDYLMEIATHDYGEQNHRLTEKIKNGQNRDYIKTNRAGYDIIKDSKSDTKQSSPISYTKDNSNELLHTISTKDISLNPNASCYKPKKSIDTPKICKRDNVYAT…
Transfer_SR00010599-RA	MSKTMESNKKNATNSCCSQQNASNSDLNEISVESQQLTEKVGLKYLPNWPPVNLEFRDLNYSVPDLTKGSKLILRGINGEFRANELTAVMGPSGCGKTTLLNVLAGYNASSASGQINVNRRPRQAKVFRRMSRYIMQNEVLDPHCTVQEAMILAAHLKLGNELTLSQKMEMIDEILNMLRLRKSEKTMCGRMSGGEKKRLSIALELVNNPPVLFLDEPTTGLDDLSSSQCISLLRRIAHSGRTIICTIHTPSAKLFDMFDKVYVLADGQCAYQGSTHHIVPFMNAIGLSCPLTYNPADFVIEVAGREYGNEYYDKMVAAVANGKCSRWTPDFDYETLTNESQEQIKSMEQFEEEIDPKMLKSKCPWLLQFRLLLRRMLIQMWRDKSYIKLKFFVTIGLG…
Transfer_SR00010600-RA	MVQNDSATNVLLNDNRNSGAVVKAQIVPAQPKTLQHLPKRPAVDLGFHNVSYGVKEGGSNRVKKILKDVSGRLRSGELTAIMGPSGAGKSTLLNILSGYKTNVTEGTITMNGRERNLSVFRKLSAYIMQDNQLHSNLTVQEAMTVATNLKLSRKFTKQEKNAVINDILLTLSLSEHRNTFTRNLSGGQKKRLSIALELVSNPPIMFFDEPTSGLDSSTCFQCIHLLKMLAAGGRTIICTIHQPSARLFEMFDQLYTLAEGQCVYQGSTKQLVPFLGALGLECPSYHNPASYVIEVACGEHGDNQGSLVNAIENGKRDIRTAVDFAGIKARNDLVKVHNLKAMLDKNDVQNATCSKFGDNLALNNQLLTANLVNDLAKDSDTVAAAQTNDKGDLVIDVEK…
Transfer_SR00010939-RA	MYHNPADYIIELACGEYGNDKVEILKQATQNGKNLAWFDDPDQILNSEALIRKYPIQKRLSKRSLEDTTFMNQLGVLIKRGYIKTKRDTTLTHLRIAVNVFMATILGLLYYGAGNEGSRVLDNYNLLFAILMHHSMTTMMLTVLTFPIEMSILLKEHFNRWYSLKAYYTSITILDLPLSIFCCLLFSAMIYVWSHQPMELSRFFMFFGISFLITIVGHSFGLIIGAWFNIVNGTFLAPVLTIPMMMFAGFGVTLRDLPSYLKWGSHISYLRYGLEGFVGAIYGQGRETLQCNEASYCHYRYPNKFLAEITMQGDLFWHDFAALFGIVLIFKVVAYFILKAKITSVK
Transfer_SR00011658-RA	MAKLEHKNRSVDITFSNLTYTVNSAKRGKKKDVLKSISGTFKSGELTAIMGPSGAGKSSLMNILTGFVKSGVHGTVSFGNTTKSRKMCCYILQDDHFFPWFTVEEAMILAATLKISNNSMNLKEKHMLIEHLLDMLKLTNAKQTKCARLSGGQKKRLSIALELIDNPPVLFLDEPTTGLDSSSSFDTMNLLDELAAEGRTIVCTIHQPSSTVYNLFKQIYVLDQGKCAYQGSPQNTVKYLQSIGLTCPEYHNPADYLLEVVCGEYGDFSAELIEAAQEKKWRYDAIEDVENMNSVQLVKMNEAAQSGQKRWPSIESTKHVYPPPEWVKLWLLIGRCHVQFFRDWTVTYLKLAMHIMCAILIGLLYGDSGSNATKAISNVGLFIFGIAYLWYTTMMPGIV…
Transfer_SR00011962-RA	MASLQYFQWYWTDFCPTGITPFATDSNDLLPCFQEIALQIPVYTIFAAVSSYNFGCYNRPVIRNSTQKRLIYLRIITTLFLAALPAVKIFYFHSVGLEIHPIDVLVVSVEFVMWILHCGYLLSSRRFGELSHRGSLSLIVLWSSVFVLDVVWLRSSLSQLFWPWSLATVIMDIVYGLTLIPKGAAVPSMQNIDRNNEQQALLTNRYTYFHFNLNEMLLGHAQDEATWFSKFFFYWVDPLITKGVAGNLKRIEDLFDLPDCLNISRISEKLQMQISRTKSTFWALHKTFGREFYLIGLLRLIADTSGFAGPLMLGGLLREQTDDVSESYSRPYWLAFGLFGSTLLSALCSTHFNWRMAIIGMKMRIGVVSAIYRKALEARGLKNSRPEILNLMSTDTDRI…
Transfer_SR00012416-RA	MIGSDYVLEAHNIFHTTEVDGGGCFNGGGSTAMVLKGVNLTVHSGEVMAILGSKGSGKRALLDVISRRAEGSTRGQVLLNGTPLSKALFQQRCGYVTQSCTFIPGITIAQTLHYTATILSGYLKSSKVRQVLADLALSQVAHKRVEYLNISEKRRLAIGIQLVRDPVMLLLDEPTQGLDPLSAYLLISILSNTAKKTGCGILLSLEKPRSDVFPFLDRALFLCLGGVVYSGSTRAMLEYFHGIGFPCPQLENPLMYYLCLSTVDRRSRDRFLESSQQIEALVERFSRETPIADAPLNSMGSGKVPLAYGKPGELKVWLMLYLKLLASTFSCGVAGMHSLFLRLFLLPLAMALLWMFYWNIGDDSYGFFSKNGMILNVIGLSYGCGILTTVSLYPIWRKR…
Transfer_SR00013424-RA	MAKRPSGIFKQFLLLLHKNLLLLWYSKFQLLLQLCVPAIICLLLVPIRLYKKAETQPAKTFKTKYSVGVLDYDKWLYYSRDFVYQSYDHLVYKPYNPCYKSITRHAAGILQISYSTPGNEDLYYFKQPLTIVFDESTDCKSKLKYQIRFWSNLLSADYFIPNITFMTNDLFIEYEPMGPRFKNLEDGGMPVGYLREGFLDIQNAISRAFINLTARHFKKQRLPKVVFQQFPYPEYKKDDVVFMLANMVPWIIMLAYMYPMMFLMRQFIMERRKKEVMIMSGLKNCLYWLTWLGRAFVIMGLSTYLVTKVLTDKWGENQYGILNNSSFDAVYFFLFAYIATSITFCIMLATMFSEAMIAVIVMVALWFITFLPFMPYSVLAESFVYLQLLTKLMWSLIPN…
Transfer_SR00013434-RA	MAKQTDSNIKEFLLLVHKNLLLLWHCKFKLFVELFLPVIFCLLLVPIRLMKKPKEISATTYNESIPLGNLDFRKRHYYDVVRPVSFKTYNHLLFNAENQCYKSIIKDAADALGVTYTDLEHEKKSLTPIKIIFRKPTDCQKNLNYDMEFSSHVLSAYYGIPNITWMTNQLFFEFDPIGPRYPKEQYGPLYLKDGFLDVQHAIFTSFIKLAAKNFKNQELPTMAVQRFPYPKYIYDEVIFQFANVLPLIIMFTYMHPMMFIVRQVSTEREKQLKDVMIMSGLQNWLHWSAWFVRAFVFMGLSALLVTIVLTVKWGENKYAILNNSSFTGVYFFLLVYIATSITFCFMLATMFSEAIIAVIFMVVIWFITFLPFMPYSILAGNYVNMTLFSKLLWSLIPNT…
Transfer_SR00015763-RA	MANHTERPVWGSPDTAVAMRHAFKSYGKGKNANQVLNNLNMTVSKGTIYGLLGASGCGKTTLLSCIVGRRRLDSGDIAVLGGKPGTRGSGVPGKRVGYMPQEIALYGEFSIRETMMYFGWIFGMESKEIRERLQFLLDFLDLPSEKRLVKNLSGGQQRRVSFAVALMHDPELLILDEPTVGVDPLLRQSIWNHLVHITKAGQKTVIITTHYIEEARQAHTIGLMRSGHLLAEESPSVLLSMYKCLSLEEVFLKLSRIQSQKGELTQVNFSNNISLHTMAFGSKKDNPSSSHEGGVVGLNYYPTQSKEVLINDSNGSIYTLNQENFNPPSPYKKQNDNPPTDCFADLCEITSKGKIKALLTKNFLRMWRNVGVMMFIFVLPVMQVILFCMAIGREPQGLN…
Transfer_SR00016076-RA	MIEVPEKNWPYYPHFALSQALKKMYYNSQCWKYCQDIPYLQDKLCYWYKECCPLQPYLSNESNGIIPEVKALLITTIVCFLLLILTEYISILKLWDTMRGIYTKLTKPQSTNKKGNQDEEDEKLRVEYLSTNDSKRTNLVIKKLTKYYGSRVAVNQIYVGIKNRECFGLFGVKGAGKTTVLKMLTGEERISSGNAFVKGLSVKWRMNTIHRKIGYCPQQYYGFFDNLTGRQNLHLYALIRGIPQDKVSLICLQLAIFIGFLKQYCEPVREYSSLNKHKLSIARAMLGEPSVVYLDEPTIGMDPVSRRNVWNMICKVRDTGSSIVLASHSMTECEALCNRFAFMVNGEFQHIGSTQYTKSRLIKGLILKIKMRRKIDVKDTDASVHSVLNFIRSKYPSEC…
Transfer_SR00016088-RA	MAAVEVRNGYKYYGSSSNPKIILNYLNMNVMRGSIYGLLGASGCGKTTLLSCIVGQRQFNSGDVTVLGLIPGLPGSGIPGSRIGYMPQEIALVEEMTVKETIYYFGRIYGLNDERIREKFKILRDLLQLPPPKQLVKKCSGGQQRRVSFACAMIHDPELLILDEPTVGLDPMLREKIWEFLVESTRNSKMAVIITTHYIEEAKQANCIGLMRNGILLAEDTPVNIMANFDVNSIEDAFLHLSSKQGKSDEIVASTNRQLPIATTTTMAASLTPAITSVDVSEPEMYEDKNANIEKIQKPPLVFHENKRKVFFTTQGRVKALMTKNFVQLFRQPSGVIFMLMFPIIQLSCFYLAIGKTPGNLKIGIVDNEVPDYESCFAHNSKSVYNMNGSCMFHKISCR…
Transfer_SR00016388-RA	MDSRLFKVFLWKNYLCLKFNWISTTIINVTCFVILYLFLKTTHSIVTAPRSDYTIRTTDDLKENVPSSNEDYIFYAPSNVSYLDKLMENVRMDLEMTTESFISFRDSLAMISALENKQQSNCFGIFFEKWPDGISKGSLQYSISSTITKVFPKQRYINDEDVNRIIHEDEYIRTGFLSLQHLIDLNFMKSSTENNKDLKIGISPLPSIGHESVDGQRVNSFGFLFAVLFNVLMLSTILIPLVEEKHDGIKEFLVLATPKNFLNGLSFFCVRFLTCMPFAIGSVAVANFYQALGLVPMIYYMFVFVLYCSSAICYSFLISVIFKTVFYAKVGGFLLLIVPFLFHLIDEKLSNVTSYLFCTTTFLKGIHIFQVFTNKHRAFVLEDSLFNITETSSNLFSIL…
Transfer_SR00016901-RA	MDHTACIKQSKDVEFQDVFYTVTQRKNYVKVTGRSNILCGVTGAFRNGELSAIMGPSGAGKSSLLNAISGYSTSGVTGHIKINRRDSCYITQDDSHHTLLTVQELMNLACDLKLKNRQGCEDLVTEILENLHLNHRRNTTSDHLSGGERKRLSIALELVANPNIFFLDEPTSGLDEVTAAQCIRLLSRLAREGRTIVCTIHQPSATILSYFDNIYVLAKGQCVYQGTPSAILPFLDHINLPCPMYYSPSDYIIELCDSEEGHLIPSLAEVTQNGKLMYSTMAPHSLPFEKNNQTEMISRNAVTTMFIEENSKRRMLPCCSIMDRDGAFALVEKMKAFSKRIRSDRENISSFRQFYVLLNMMMLKILRSRIALSIQIVHHVMCGLCFGIIFYKSANEGEK…
Transfer_SR00019248-RA	MSSKKSKKKERFDDDEEVNVPTPATKSLKKGKKGKRNYDSSGDESVPSSKVTDFNDEEIENGKAKKSQKKQSNTKKGRKAAYDSDEMTDVGPPKPVKKSAKKGKKSKNEFSDDDSSKHIVGVQSDDEEIPVAKPVSKKSTKKGKKSKTEFSDDESPKHDIVGAPSDDEEILVAKPASKKSTKKGKKKHNEFSDEDDNEVSLSNHTTDQDEPEEIVPAQPALKKSSKKKKRDTFEKESIKADSKDDIDEMDNISESIEEKSIEQIEEMPAQETQQSIAKEPEIEEVIIPGDEQIEKELKELNINETKVKKLTHKEKKKQKKQEEYERQMELMTRKGGQGHSDLDSNFTMSQVQKTAGQMAQMEFAVDIKIENFTISAKGNDLFVNANLLIANGRRYGLVG…
Transfer_SR00020011-RA	MVIQCLSCCTRLRLSRLLITSPLSLRSGLTITSGVTTTTTATLRLFSSSSINKLLGSGRNRIFTLKRPTGRPPTRDMATVRKRKAELPHENDNLGTHSKSDIPKIAAKADKPPKVKLKKQDVGRLFALAKNEKLVLAAAVGCLVVSSAITMSVPFALGKILDIIFTRDESGNIQTLDKLRHFCFILSGVFIIGGLANFGRVYLFNSASVRIVRDLRSKLYRTMLNQETGWFDTKGTGELIQRLSNDTFFVGNSLSQNISDGLRSTVMILAGTSMMIYTSPKLALISTCVVPCIAGIAVIYGKYVRTITRSYLDKHALIAKGAEERLGNIKTVKAFCRENAEAQYYDNQIVDAMKLAYNEVMAKSIFFGFSGFSGNVIIISVLYYGGSLVVSDLLTIGDL…
Transfer_SR00020128-RA	MDAESEGVPPIEPAAPQMDLAARRRLFMSQPSTLATRKQQAVCVRRAHKMYGTVKNPNIVLDGLNMTVPKGSIYGLLGASGCGKTTLLSCIVGRRRLNSGEIWVLGGRPGSRGSGVPGPRIGYMPQEVALYGEFNMRETMRYFGLIAGMANGDIEDRTEFLLKLLNLPNASRFVKNLSGGQQRRVSLAAALLQEPELLILDEPTVGVDPVLRQSIWDHLVDITQNGNTTVIITTHYIDECAQAQVIGLLRGGKMLAEESPVFLREKYNADSLEAVFLKLSVLQNAGKRRRSSIAQEIIEQVDVPAITNPALDLSDEANPEISGEFGDNISMSSHGRDPITASAAPAPPLPPDEEIPTSWTYNFNVMSMNHLHALIWKNFLWMMRNVGVMLFIVGLPVVQ…
Transfer_SR00022007-RA	MQSMKADALPQNPRERANPLSFLCFCYTLPTFFKGRKKVLDSNDLYAALKTHKSDTLGNKLCAAWDNQLQRRSKTGKQPSLLRATLSVFGFQFSLFGLVLFFIEIGLRITQPLFLGGLVTYYSVTENPDTIMTAYLYAIGIIVCSAFNVLFQHPYMLGTMHVGMKMRVAMCSMIYRKALRLSQNALGDTTAGQVVNLISNDVGRLDLATIFVHYLWLGPVQTVVITYLMYIQIGVSSVFGVAFMLLFLPLQAYLGKKTSVLRLRTALRTDERVRLMNEIIQGIQVIKMYAWEIPFGKMVAHARKKEISPIRYVSYIRGILLSFIMFLTRVSIFTSLVGYVLLGYVLTAKQAFMVTAYYNILRTTMTVFFPQGISQMAEALVSIKRIQKYMLYDETNVRD…
Transfer_SR00022369-RA	MTEGIMNLIAFLWGDVHCLAAILIVGTLIGCFLNHHVDLRQRLLGARMRIACCSLIYRKTLRLSKKTAGTTPAGYLVNLLSNDVNRLDYGFIYIHWIWILPFQSILICYLIWQKIGIAALVGVVGLLLKTIPVQTGLSKLSSKLRMKIAYRTDNRVGIMNEIVQGIQVIKMYAWEIPFQSVVAEARRREIKQIRYASYLRGFYLSTMVFTERSTLYITIAAAVLFKQAVTADVVFSMAQYYNILQLVAAIWYPLAVSFGAEALVSIERIQDFLKLESHDEKANGLTQKTVFSPDDNNSQAILLKDIDANWDAEKESHTLQKINIDIKKGQLCAIIGPVGAGKSSLLQLLLGELPIIDGNVLINGDISYASQEPWLFTGTVRSNILFGETFDKKRYHDIT…
Transfer_SR00022642-RA	MAVLSKYFDKIIKKYEEVGYTVHGFSQVVVGAAVIAYSLKMTYPLLRNNLSAAKRNPSINKAAIQKCNSDSYTGDPNLKSEHKITFNDDESKIAEAEQLLLASKKKSQEVLPGLNQEFLAQLQNLLKVMIPSPFCYETCLLSVHTLCLISRTFLSIYVASLEGAIVKFIVRKDVKQFAIMLMKWFGIAVPATFINSMIRYLENKLALAFRTRLVRYSYRLYFKNQNYYRVSNLDGRIENADQRLTEDISVFASSIAHLYSSLTKPCFDLMLIGFALMSSSQKMKANIFSGPAFSLTVIILTAHILRIVSPKFGQLVSEEANRYGYLRHIHSRIIANAEEIAFYGGHKVELSQLRQAYNRLVNQMNTIFTQRLWFVMLEQFFMKYVWSGTGMVMVSLPIL…
Transfer_SR00025275-RA	MKDLFRRGLQGPLTDEELYEHKKDLGSEGVTEIFARLWEDEKLRKKPSIVKLIFRVYGTRFVPLGILYAFLESAMKALQPLCLGNLVSYFVAEQNLVTKDEAYMYALGIVICSLLPIITFHPFIFYIFQVGTKVRLGLSGLVYRKCLKVSKSASNDGLRGRAINIISNDLGRFDVALCFLNDLWKGPLESLLIGYLMYREIGFSAVLGVSFMLSFIPLQAWVAKKAAYYRRLTAERTDVRVKLMNEIIQGIQVIKMYAWEKSFAKVIAQVRLKEVNAIRGTSYIYAALSCTTMISRLSVFLSIVSYVYIGDEITAKRVFTVSSYFSMLNESMVHFWPWAITFCAEAVVSANRCKEFLLEAEDLAQPRKTKDESRRPTIVKDNKTEINGNAIVPPLSPIV…

## Sheet: 5.P450s
CYP4AC16	MCKRIKRIDGGDLNQLYPVIPGKTIFGNNFDVFQLSPEAAFAFICSCVKYSGGRSFIWLFLENSVYNVCRAEEAENVLNSQALLSKGVVYTLLQTFLGEGLLTSTDKKWHTRRKLLTPAFHFNVLQSFIEIFKEESQKFLKILEGHVDKEIPLVSVIPRFTLNTVCETAMGVKLDNLSDGDEYRNHITNLEHRLVKRTFNPLYYYEWIYKTFGDYEEYTKHLTVVHNFTKSVVNRKREEFRKTTALNNVESDEIGKKKRYAMLDTLLDAELKDQIDHNGICEEVDTFMFEGYDTTSTCLIFSLMNMALNKDIQEKCYAEVCQLDDLQSLTVFDFNKMEYLECVIKETLRLYPSVPFITRESKEETSLNGIILPKGAQINIYPFHIHRDPRHFPDPLKFD…
CYP4C165	MLQASVILSKLLAICSASTIALIVIALVCFITYKLRRERIVKLIEKIPGPASLPLLGNAVEMNVDHDELFMRMTGAQRLWGNRLGINRAWQGTSPYVMLFHPETVEPILNTSKHIDKSQDYDYLKPWLGTGLLTSFGRKWHSRRKILTPAFHFKILDDFIDVFNEQSLILANKLDREVGSESFNIFPYVTLCTLDIVCETAMGRCINAQSNSESDYVKAVYGIGAIVQTRQSKLWLQWNSIFRLTENYNLHKKYIEILHGFSNKVIQERRLEIESVLNSNSKKKRLAFLDLLIEASKGGTVLCNEDIREEVDTFMFEGHDTTSAAISWTLFLLGSHPEIQNRVIEELDEIFEDDRTCPATMQNLLDMKYLECCIKDALRLYPSVPMMARSVTEDVEIGN…
CYP4D100	MFFELLILLITVVLLYDYLSKKRVNDVLSYMPGPTSLPLVGNILAYVGRTPEDIFNLIAANRQKYGPLYRVWIFNRPAVFCAYPKDVEVILNSSKHITKNSLYDMLVCWLGYGLLISTGPKWHSRRKVITPTFHFKILEQFVEVFDQQGKDLVEAIKDKADGKTAFDVYPFICRMALDIIAETSMGTKVNAQKNPNFGYVKAVSDITAIFSQRLLKAWYRLDAPFKLLEPKLYKRQIDTIRKMHDFTENVIQKRRDALEKEIATELKTEKIDDNMGITKKLALLDVLLQAKIDGKPLSNEDIREEVDTFMFEGHDTTTSAMSFTLYLVSRHPEVQNKAFEEIRDVIGLDTTKSITLHDLNNLKYLECVIKEGLRLYPPVPLIGRRIQEDSEINGKKIPA…
CYP4D101	MMFILILLGVVVFGIKFYQHHYGTLTKYGNLLPGPPTVPILGNALLFINVPVEENLKILSECIKLYGLTYRIWIGKELNVFFHDRNDLKVIMGGSAFIDKASVYDLMKPWLNEGLLVSKGKKWHTRRKIITPGFHFSVLEEYFHIFEKHSQVFCDVLKKEMESGFIELYQLVNRYTMDVISESAMGVSVNAQTNTDSEYVQAVKTISTVLHKRMFDILYRFDLTYMFTKLARDEKRALKILHGFTEKIIIQRREEILKEKQNKDQTKTDTNDIGAKRKMAFLDILLQSEIDGKPLSNLDIREEVDTFMFEGHDTTSSAITFLFFNIARYPEAQKKCFQEILETFGKDKNKPVTFESLNNLHYTELCIKETLRMFPSVPLLGRRVTKECEINGKIVPAGA…
CYP4E18	TLLNLHYLLFIGKQKNYVYLEILQNLRKWIREYRRFRLWIGFEGNIVTCEPKDIECILTSSQILKKSNIYDLLLPWLGQGLLTSSGSHWHSHRKMITPSFHFKILTEFLDTMNKHSTTFVKKLREISKDGRIFDFQQLVCYCTLDVICDTAMGVSMDAMSNTDSDVVKAFKYMCYSIQMRAFNPFMRKEFLFKLSPEYKNFKLALDTLSEFTMEVIRKRREVLKNCSEEQNEGDDDKINIRSKKAFLDTLLSSTINGKPLTVQEIYEEVSTFMFEGHDTTASGISFAVYLLSRHLKVQERVYEEQMRIFKGDFEHQPTFNDIQEMKYLDMVLKEAQRLYPSVPIVGRFTEKPFDLNGTILPKGTTVNLFILAMGYDEQSFHDPYKFDPERFNPDTASKR…
CYP4G299	MSIAQEVIKEPMMVSASSVFYFLLLPTFALWFVYWRLSRRHLYECAAKLPGPEGLPLVGNLFDAIGSPSKVFETVIRKGEPFEYVAKIWIGPKLVIFLYDPRDVEILLSSQVYIDKAPEYEFFKPWLGDGLLISTGHKWRSHRKLIAPTFHLNVLKSFIELFNENSRNVVNKLKSEGEKTFDCHDYMSEATVEILLETAMGVSKKTQGKSGFEYAMAVMKMCDILHLRHRNILLRSEFLFSLTKHFKNQGKLLDIIHGLTTKVIRNKKEAFAKGTRGSLAQTSKSFEAFNFQVDSKKSTVVEGLSYGQAEQLKDDLDVEDNDIGEKKRLAFLDLLLESAQNGALISDTEIKEQVDTIMFEGHDTTAAGSSFFLSMMGIHQDIQDKVIAELDEIFGDSDR…
CYP4S48	MDLYSKHKSTFGIWMGLNISVFISDPDDAKIVLGSNRLLFKSQNYKIFEPWMGKGLLTSGGDLWHKKRKMLTPAFHFRMFTEFKQSVFDSCDIMIENLKMHLNDEPFDICPYISLLTLDVISETAMGLKQNAQLQSTSEYVNAVKIMCHLFSIQFFSVWKKHEFLFRFSKEFEIRKRALEILHGETNRVIALRKSFFKKMNISSLGEAEKFYQNGAKNRLAFLDILLLNQMEGYDLSDTDIRDEVDTFMFEGHDTTSTALSFTIYLLSQHKVEQQKAFEDAVALKGQENESMKYLEAVIKESLRLYPPVPMYGRKVMEDLQLSNIKLPKGISVAVAAFLLHRNEKCFPEPNRFIPERFLGDANKAGPYAFTPFSAGPRNCIGQKFAMLELKCILASLLR…
CYP4S49	MDVVIILVALIIICLVRLLPNILSFLRIVKFSTTLKGPGAWELKQNMRKGALLNWLLDLRKRYGPVYYIRLGLHLSVFLSDPEDIKCIIGSNKILYKSKTYQVLEPWLGKGILTSGGEEWHKKRKMLTPAFHFKMLEEFKQPMEDNCKILIEKLKEKADGEAFDIYPFLTLMALDIICETAMGIQINAQLESTSEYVTAVQTMCRLCHEQFFSTWRRIEFLYKFTNDYKERTQALSVLHGETERVIKLRKESRKSELVSRSDDNTDEIGIKKRQAFLDILLEAQAQDPALTDYDIRQEVDTFMFAGHDTTSSLLGFAIYLLSQNQAEQQKAYEETISAEGPGKYLEAVFKESLRIYPSVPFYSREIMEDVDVRGHVLPKGTSVGIITFAAHKDERYFPE…
CYP4YQ1	MVSLFGVLVLLIFLTLVQYFLNKHKNQLVANLTGPYPFVLLGSVHKIFCLSPQNFFKQIVYFRKIWGKVYRIWIFNRLIITISDPKVAEVVLSSQTHIRKHRLYDLLRPWLGTGLLMSDGRKWFSRRKIITPTFHFQILERFVEVFDQQSNVLVKQLERHCGTGEAFDVHPFVGLATLDIITETAMGTKINAQTDPTNEYSRAVNDITRIMSLRFLNVPIANDFIFSIVCPKIRRRQYECIKTMHSFTIKVIEEHRKELQDSINENGSLMLVNNVESKKRMALLDVLLQSTHEGKPLTNEDIREEVDTFMFEGHDTTTSALSFALTQIARHPEVQQKLYEEIADVLDRKENNYISYRVLQELKYTECVIKETLRLYPPVPVIGRELSDEMSYDGGVLPA…
CYP4YQ2	MLVGLLLFIAFVFLVDYWAKKPKNDMMKNIPTVRNIPIIGAVSEMASFNAENLAEKFKQFREKYGKSYKSWILHSLILNTSDPKHVEAILNSPKHLSKHVLYFMLREWLGQGLLLSDGTKWQNKRKIITPTFHFKILEEFVEVFDQQSTILVEKLKSMADGETVIDIYPMICLMALDIIAETAMGTQIKAQEDGNSRYVKAVNDATDILAMRFMKPHIALKKAFKFFKPKLCNKLLESILYMHVFTNRIIENRRMTLNISKVQKNRYDDENMGIKRRMAFLDVLLQATTPNGEPLSNEDIREEVDTFMFEGHDTTTSAISFTLRAIACHPEVQKKLFEEVRESFGDDLDSPITYRGIQELKYMSCVIKESLRLFPPIPAIGRYIREDFELHDCTIPAGT…
CYP4YR1	MIATTLFIVVLAVCLIDILWKRKTVYKLKHLPSPVSLPVIGSIWIYLGKKPDDLITMAKVLPQKYGKTFRVWIFNILAIYTSDLKDIQEILNNKAIEKKNRMYAMLHIWLGEGLLVSYGSKWCIRRKIITPTFHFKILEQFVEIFDCHSKILVKKLRTHADGRTPFDIHDYIGLTTLDVISETAMGTPINAQTDDNCEYVKLLTKVTDIFVKRFINVLYRSDRLFSIFAPGLKAENDKAVKELHAFTDTIIEKRKEELLKPPESIEKEVKQRLALLDVLLLSTIDGKPLSNTDIREEVNTFMFAGHDTTKSAIGFTLYCISRNPEVQKKLIQEINEVFGTDVDKEITYRQLMELKYTERCIKESLRVYPTVPFIGRQALKDCVINGKCIPKDATILIPL…
CYP6D34	MFVLILLGVISALAFYLHHVYTFWQRKGFPVVAAASRIPFGAMDSVVKRQRSFGMAINDIYQSTTERFVGIYLFFRPAILVRDAALARQMLVQDFASFHDRGVYCDEKNDPYSGNLFSLPGERWKSLRTKLTPSFSSGKIKSMFGSVAEVGDRMMEYLDKHVAEGDDGSVLEMKDLFSKYAIDIIASQIFGLEVNSFKDTNNPLKKVSLQLGRPTLSSVVRGTAAFLYPPIMRLLAFLRIPDPVAISMKSMVRQTVEYREKYNYHRKDLMQMLIELRNTGKINLDDEIWKGESVAENLKSMSIDCIAGQAFLFFVAGYDTTASTAAFTIFELAKHPEILANIQKDIKQALDKHDGNITYESIQEMKYMDKCIMETIRKYPALPILNRECTADFPIPGSD…
CYP6D-fragment	MKRLVRDTVEYREKNNYTRKDMMQMLIQLRNTGKVNIDDNNWAVQTSADAFKSMSIECIAGQAFLFYAAGFETSASAASFTIYELAQNPELMAKAQKDIEQTLEKYGGKLTYECIKDMKFLEMCFMESIRKYPGLPILNRECTKDFAIPDSDKIIKKGTPIVISLFGIQRDPEYFPDPLKYDPERFSETNQNYNPVGYMPFGEGPRHCIAQRLGKVNVMVALVKILTNFNLEAVKKGEIEFDNFAVTIVPKGGVNIKLKRRVH
CYP6G31	MLESYLTTLVLLHIALVLTYIWLKSFYNFWQKNGIPFITPSLLAGNFKEMIILKRCPAEQFQAMYMNSATANEPLVGIHIFHKAAVLLRHPELIKRILVKDFTKFSDRYSTSDLYADSLGSKNLFFIKNPAWREIRSKISPVFTSGKIKQMFPLVEEIGRQLDSYLKSLPINPTTQSTCQELKEICALYTTDVIATVAYGVQANSLKNPNGEFRSHGRFIFDFTTKRAIEFVTVFFLPRLVPFFRFKVFPKHSAKFLRSTINYVMRVREESGMARNDLIDILLEFERSAKADRRKSQIALEGDILVAQAALFFTAGFETSSSAMSFALYELAKRPDLQNRLRCEIRDALEENGGEINYRMIIGLQYLHMIIQEVLRLYPPLGFLDRECTLPEGEEYSFD…
CYP6G32	MFLVSELLVFLTTVIFAVYIWSKYNYTYWRRKNVPYIEPNIFFGNIKEMMNFSKNVADHFVDLYNHPKAENEPVLGIYIFQKPALLIRDLNLIKSILVKDFNKFANRFSSSDPHGDPLGANNLFFIKNPMWKEMRTKLTPVFTSGKIKQMFPLVEEIGRQLDSYLCDLPMDSNSCVQEIKEINSLYTTDVIASVAYGVHANSLKNPNGDFRRNGRDIFTFNLMRAFEFTALFFMPYLVQVFRCKVFTKKATKFIRDTMNLIMAERMRSGAVRNDLIDILVAFKKERESEPDNNKTFVMTDDMLIAQAGIFFTAGFETTSATMSFGLYELSKKPELQKRLREEIRNVLKENEGKVTYDAINKMEYLNMVIQEVLRMYPPLPFLDRECILGRDEKEYSLEP…
CYP6G33	MGLSEWLLVLCGVLTLLYLWISHHFSYWRRKNVPFIDPNFIFGNLKDMVIMKNCAANHMIELYNHKNSQNQPIVGIHIFNKPALLIRDLDLIKNILIKDFNKFADRYTECDPHSDALGSFNLFFVRNPYWKEIRSKLSPVFTSGKIKQMFPLVEEIGAELDKYLCNLALGADTNAVEVKDICALYTTDVIASVAFGVQANSLSNPNGEFRRNGRALFKFTPYRAFEFTTIFFLPQFAKFFGCKMFSPEAASFLRGTIKYIMAERTKTGHIRNDLIDTLVAFKKAADADETKQHIAQNTDMLVAQAAVFFTAGFETTSSSMSFGLYELSKKPEMQKRLREEIKDALVKGNGKITYDLISEMEYLNMVLQEVLRLYPPLPFLDRKCTLPEGEKEYPLKPLS…
CYP6G34	MISATEILLLLSSILFGLYIWSKYNLSYWKRKNIPYIQPNILLGNLPQLIKLTRSCAENLKDIYNHEIARDQPALGFYLLNKPALLVREPELIKSILVKNFNKFSNRYATTDSDKDPLGTNNLFFIKNPHWKELRTKLTPVFSSGKIKQMFPIIQEVGDELDKYLTDFKVDKDSSFVQEVKETCALYTTDVIATVAFGVQANSLQNPEAEFRINGRSIFDFTIPRAIEFLVVFFVPQITKLMRCKVFPKKAASFLRNTINHVIDARIKSGITRNDLIDVLIAFRKTADAGIENEKSNLDMSNEFLVAQAAIFFTAGYETSSATMAFCLYELSKAPEVQERLRKEIKNVLVNDNGKITYEAVNEMEYLNMVVLEVLRLYPPLPFLDRTCTLANGEKEFSF…
CYP6G35	MFPLIAKIGIELDKYLCNIPLDSTNCIKEVKEISALFTTDVIASVAYGIDANCLKNPNSEFRKQGSAIFHWSTFTTIRFNGVFFLPELGRLLGFKTFTKEAASFIRNTITYVMKERIKSGTARNDLIDTLVSIKKQAAADGEELDDEVLIAQAAVFFTAGFETTSSTISFGLYELSKNQEVQKRLREEIREFLEKGNGQITYDALNEMTYLNMVTLEILRLYPSLPFLDRECTLTKDEEGYSLEPFSDFKVPHGMPVYISTYALHKDPKYFPNPEEFDPERFSAENKPNLVSNAYMPFGAGPHSCIGERLGIIKAKVGLISFLRSHYLTTCEKSHKKLTFNPKAVLLSAQGGLYCKLVRDPLFVEQN
CYP6G-fragment	MGVSEWLLVLTGLVTILYFWSKHHFSYWRRQNVPSIATNPIFGNLKELICMTVNPAVHVASLYNHEKAQGQPIVGIHIFHKPALLLRDLDLIKNVMIKDFNKFSNRYAACDLHGDPLGHLNIFFIKNPQWKEIRTKLTP
CYP6ZQ1	MAVSGVFIYLLIAVVTAAVYFIRQHLTYWKRRGIPHDPPGFPGGNMTRFKKTHHFRDITKENYDKYKHTGPFGGFYFFLKRAVVIYDLDLAKNILIKDFNNFVDRAIFHNERDDPLTGHLFALDGQKWRPLRNKLSTTFSSGKMKGMFPIVLSVGEELKQTFSSMIEKEPIVEVKDVLARFTVDVIGNCAFGLECNSLKDPHAEFRIMGAKAFNQPRHNKLVELFIFSFPKLAAILRMRQIHDEVHEFYMRVVRDTVNYREANSVKRNDFMNLLIDLKNSKEGLTFNEVAAQAFVFFLAGFETSSTTMGFALFELALNQEIQDKLRAEINAQFEKNGGHLAYESMAEMHYMDMVIKETLRKYSIVTNLIRVAENDYAASETDPKYVIPKGTMVLIPADS…
CYP6ZQ2	MRDICRDNSNNFKSKCPFRGFYFFSNPALIVYDLDLLRDIFIKDFNNLTSRGIFHNEKDDPLSGDLVGLEGPKWKELRTKISPTFTSGKMKYMLQTVSMVAERLVDTIDGIIEKTSVFDVKDIVGRFTVVVIGTCGFGIECNSPKDPHAEFCQMGENALKLKRHGFLLSMFLFSFPDWAQKLHIKQTPEVLEAFFMRVVRETVEYRKKNNVKRNDFMNLMLELKNSEECISIEEFAAQTFVFFFGGFALYELAKNQEIQDELRRDVNATIGKHNGQLTYEYLMEMGYTEKVFLINDYPTSNQQFVKKKNSVVLIPVDDIRHDPEIYPDPENGLVPMKYKNVIYSAGCHLVKVQGIVLE
CYP6ZQ3	MVFLATLVCLLVTLAVLVFAFVKHRYNLWKRLGIPHDKPVFPYGDALKLMSTDRHGRYNMMEFYQKYKGTTPFAGMYFFLTPVAFILDLDLIKEILIKEFHNFSDRGMYTNEEDDPLSGHLFSLDGEKWRSMRNTISPTFTSGKMKFMFPTIVAVADELLEVITKSVETNPEVEIKDLLARFTTDVIGTCAFGIECNSLKDPNVEFRTVGVKAFSMPRHGKLVEGMIFALPNLAKKFGMRIVHDDVHNFFMRVVRETVEFREKNSIKRNDFMNLMIEMKNSGSGLTVEQIAAQAFIFFVAGYETSSSTMGFALYELALNQDVQDKLRDEVNSKFDKFNGKFTYEGIEDIYYLESRLRWFALFRPTS
CYP6ZQ4	MAMTAILICVLTTLITFLVFSCIQYYFSFWKRRGIPHDRPVFLYGNLKGIGKTHHLRQIIRAYYEKFKKSGPFGGFYFFLNPAIVIFDLDLARDILIKDFNNFIDRGMFYNERDDPLTGHLFALDGAKWKNLRRKLTPTFSSGRMKGMFPTVLSVGDQLLEVFDKIVAEDPVFEIKDVLSRFTVDVIGTCAFGIECNSLKDPKAEFRVAGDKAFSKTRHSRLLTGMIFGFPRLARKLRFRFIHEEVHQFYTRVVYETVEYREKNSIKRNDFMNLLIELKNSEEGLTLNEVAAQSFVFFLAGFETSSSTMGFALYELALNQDVQDRLRTEINEQFERNGGRFTYESMSEMHYMEMVMKETLRKYSVVTNLIRRPVADYQTSNPKYVIPKGTMVLIPADAI…
CYP6ZQ5	MTAILICILTTLITFLVYFRVQSYFSFWKRRGIPHDRPVFPFGNFSGLGKTHHMRQIMKAYYEKYKRSGPFGGFFFYLNPAVVIFDLDLVRDILIKDFNNFIDRGLFYNERDDPLSAHLFALDGAKWKNLRRKLSPTFSSGKMKGMFPTVLSIADHLFQVFGKIVTDNPVVEVKDILARFTVDVIGTCAFGLDCNSLKNPNAEFRIAGEKAFSKTRHSKLLSGIIFTSPRLARKFGVRYIHEEVHQFYTRVVQETVEFREKNSIKRNDFMNLLIELKNSEEGLTLNEVAAQAFVFFLAGFETSSSTMGFALYELALNQEVQDRLRTEINEQFEKNGGRFTYESMNEMHYMEMVIKETLRKYSILTNLIRRSETEYKINISKYVIPKGMIVLIPVDAIHR…
CYP6ZQ6	MGFFACFLCLLIAVVSLGYYLIKQHLTFWKRRGIPHDEPFFPVGNLKGHPKTKHMRDITSENYYKYKQTGPFGGFYFFLSPAVILYDLDLIRDVLIKDFNNFTDRGMFHNEKDDPLTANLLGLDGGKWRQLRNKLSPTFTSGRMKFMFPTVVSVGEKLVEKFDSMVEADSILEMKDILARFTVDVIGTCAFGIDCNSLNDPNAEFRRMGANASTLKRHSKFINGLIFSFPQMARKLRMRQIHDDVHNFFIRVVRETVEYRRKNSIKRNDFMNLLIELKTSDEGSGLTIEEIAAQTFMFFLAGFETSSTTIGFTLFELALNQDIQDKLRDEINECIEKHNGEFNYDAMTEMTYMEKVVKETLRKYPLVTNLVRRAIDDYPTSNPKYVIPKGTMVLIPADS…
CYP6ZQ7	MSFSAIIFYASSAISVVVIFLIYFVKNHYAYWEKRRILHDKPIIPFGNLKGVRKTKNFHQIIREYYNKYKGTGPFVGFFVFSKPAALILDLDLVKNILIRDFNNFDDRGMFYNERDDPLTAHLFALDGDKWRKLRNKLSPTFTSGKMKAMFPIVLSVGNELVEVVREALKETSDIEIKEYAARFTTDVIGNCAFGLECNSLRDPNAEFRVWGKKTFELKRKRWVFLFSELFPELAKLLRVKRVHDDITSFYKRIVRETIDYREKNNIQRNDFLNLLMELKNRKDEAGLTLNEITAQAFLFFLAGFDTSSTTMGFTLYELALNQEVQEKLRSEVIEITGRYNDVVTYEGLQEMKYMEMVLFETLRKYSIVSHLNRRAKANYNYSDPKYYIEKNTIILIPV…
CYP6ZQ8	MAYISTLICLLVTLVVFVFAFVKHRYNFWKRLGIPHDPPVFPYGNAQKLISTGRQGRYAMMELYQKYKGVAPFVGLYFSISPIALILDLDLVKEILIKEFHNFSDRGLFTNVEDDPLSGHLFSLDGEKWRSMRNKISPCFTSGKMKFMFPTLVKVADEFLDVITKLIEADPVVEMKDLLARFTTDIIGTCAFGIECNSLKDPNVEFRTVAAKAFTMPRHSKLVEGMIFAFPELARKFGTRVFHDDVHNFFMRLVRETVEFREKNSIKRNDFMDLMIEMKNSDSRLTVEQIAAQAFIFFLAGHETSSSTMGFALYELALNQDVQDKLRDEVNSQFDKFDGNFTYDSMAKMAYLEKVIKETLRLYPPNLTLMRKSRNAYQTSDSRYVIPKGTVILIQIDSF…
CYP6ZQ9	MAAFFSVFICILIIFITTVFYYIRTLLTWWKKRGIPHDTPSFPQGNLIGYPTERHMRDICRDNYNKFKSQGPFGGFYFFLNPALIVYDLDLIRDIFIKDFNNFTGRGIFHNEKDDPLSGNLVGLEGPKWKEMRTKISPTFTSGKMKFMFPTVSMVAERLVDTIDGIIEKTSVFDVKDIVGRFTVDVIGTCGFGIECNSLKDPHAEFRQMGENALKLKRHGFLLSMFLFSFPDWARKLRMKQTPEVVEAFFMRVVRETVEYREKNNVKRNDFMNLMLELKNSEECISIEEIAAHTFVFFLAGSETSSTTMGFALYELAKNQEIQDELRRDVNATIEKHNGQLTYECLMEMSYMEKVFKETLRKYPVISNLVRRSINDYPTSNPKFVIPKNSMVLIPADAI…
CYP6ZQ10	MVFFATLICLVVTIAILVFAFVKHRYNFWRRLGIPHDPPVFPYGDAKKFMSTDRHARYVMMDFYQKYKGTAPFAGLYFFLSPVAFILDLDLAKEILIKEFHNFSDRGMYTNEKDDPLSGHLFSLDGEKWRSMRNTISPTFTSGKMKFMFPTIVTVADEFLEVITNSLEADPVVEIKDLLARFTTDVIGTCAFGIECNSLKDPNVEFRRVGVKAFAMPRHGKLVESMIFSFPSLARKFGARIVHDDVHNFFMRVVRETVEFREKNAIKRNDFMDLMIEMKNSGSKLAVEQIAAQAFIFFLAGFETSSSTMGFALYELALNQDVQDKLRDEVNLKFDKFDGKFTYEGMVEMTYMEKVIKETLRMYPPVLALMRKSLNSYQTSDRKYVIPKGTTIFIQSDAI…
CYP6ZQ11	MVFLATLICLLVTLAVLVFAFVKHRYNIWKSLGIPHDPPVFPFGDVKKFMSTDRHGRYVMMDFYQKYKGTAPFAGLYIFLTPIAFILDLDLVKEILIKEFHNFSDRGIYTNEKDDPLSGHLFSLDGEKWRSMRNTISPTFTSGKMKFMFPTVVTVADELLEVITNSLEADPVVELKDILARFTTDIIGTCAFGIECNSLKDPNVEFRRVGVKAFAMPRHCTLVESMIYSFPGLARKLGARIVHDDVHNFFMRVVRETVEFREKNAIKRNDFMDLMIEMKNSGSKLAVEQIAAQAFIFFVAGFETSSSTMGFALYELALNQDVQDKLRDEVNSKFDKFDGKFTYEGMVEMTYMEKVIKETLRMYPPVLALMRKSLNSYQTSDRKYVIPKGTTICIQCDAI…
CYP6ZR1	MEVFLTVICGVVTLAASVYFLILYQLNYWKKREIPHDKPRLFLGNIKPNAHQSIALNEAYNKYKKTGPYCGFYFFMKPTILATDLDFVKKVLIKDFNNFPDRGFYSNEIDDPLSAHLFSVDGPGWKRLRNKLSPTFTSNKMKFMYPAVIDVGHRFVQTLSEIIDGQKNESVIEIKDLNARFTTDVIGSCAFGLECNSLKDPKAEFRKFGRSVFEKQTHPALIMAFIQSAPKLARRLRMRVTRSDVEKFFMGAVFDTVAYREKNNIKKNDFMDLLIELKNNKSIVGADGQHVNTSLTMQEVAAQAFLFWVAGFETSSSTMTYAMYELARNPVIQEKLRHCINETLKKHDGELTYDCLKEMHYLDQVFDETLRVYPIVPFLQRVAVKDYILTDSPKYKIEK…
CYP6ZR2	MALVVYLLSIIVGLVSILLYFVRQRMSYWKNRGIPHIEPNLLNGNMKGVAKDRHIIEPFRELYKKFKGKAPFCGLYFFQTPGALILEPELIKKVLVKDFNNFMDRGVFFNEKDDPISASLFAIEGAKWKSLRSKISPTFSSGKMKFMFSTVVQVAQNFVKTLDEFVSPDGGSIIELKDLNARFTTDVIGSCAFGLEVNSLRDPKAQFRVYCEKVFTDQPNRFVMMCIQGCPKIARMLRMRQTNNEVENFFMGVVKETVAYREKNNVKRNDFMSLLIDLKNEKKDPLTIQQVAAESFVFFVAGFETSSSTMSYCLLELAQHPEIQDRLRVEINEVLAKHKGEMTYESLEEMHYMLQVFNETLRKYPVLPFLQRNAIEDYSTGNPKYKIEKGTTVFIPVEP…
CYP6ZR3	MDLTTWLLYLLAAIAAYLVFQIHEHMNYWKKRGVCYDQPHPIFGNVKGVSVTRHLVDPMLDLYKKYKTTGPFCGMYRFWSPAVVVTELDLVKSVLVKDFQNFIDRGAFYNERDDPLSAHLFTLDGTKWRQLRSKLTSTFTSGKMKFMFKTVLEVGQRFAEVFGEQIGENGAVIEIKDLNARFTTDVIGTCAFGIECNSLKDPNAKFREHGRKIFEKRYHRVIFVMIQTFPNLGRRLRLKTIHDDVQDFFMKVVRDTVTLREKESLKRNDFMDILIDLKNTKTEDGRDGITMEEIAAQAFVFFIGGFETSSSTMSHAMFEMARNPEIQEKVRAEVDDVLARHNGEITYESLGEMTYLGQVIDETLRMYPILALLQRRAQNDYETRLPNYKIEKGTIVFIP…
CYP6ZR4	MSLLFTILCGVATLFTLVFLFIQYRLRYWKHRQIPHDEPRIFYGNIRPNTHLAAPMNELYKKYKGTGPFCGFYYFMAPSVLLLDLDLVKKVLIKDFNNFNARGFFYNEANDPLSAHLFSLDGPNWRKLRIKFTPTFTSNKMKFMFKAVTDISQRLVNVVDEVIGDKSSEIADIGELCGRYTTDVIGTCAFGIECNSLKDPNAEFRKYGRKVLEEPNHHHLIMGFMQSCPELARKLGLRFTPRDVEKFFIGAVKSTVEYREKNNIEMNDFMSLLIDLKNNKPIQTADGQLVQTGLTIEEVAAQAFLFWVAGFETSTATMTFAMYELARNIEIQEKLRQCIDEALQNHKGELNYESLKEMHYLDQVFDETLRLYPVVAFLQRVAAENYTSSSDPNYKIEKG…
CYP6ZS1	MALWVRLLQILLVLLLAGYLFVKRRYSYWNRRGIPYEKPTFPGGNIFNNRHINESFRRNYHKFKETGPFGGFFMSLQPAVVLYDLDLIKNVLVKDFHNFTERGLFHNERDDPLTGNLFRLEEAKWKPFRSQLSPSFSGIRMKDMFVTIINIGHNLVKTFDEIVNVSGSVVDINEVVARYVTDVNGNCVFGLDCNSLNDTNSDFFRTVKLISGLKQHSKIVNMFISSFPKLARMFRMRLTHDDMNDFVVRIVRETIEFREKNSDRRNDFLSSMIELKNIDDGLNLGQIAGQTYAYFSAGYENSTAAIGMTLYELAFNQDIQDRLRDDIGNRMEKYHQRLSFECVMEMKYLKKVVKESLRKYSIVPFLLRLAKNDYQTSHSKYVIPAGTVVVIPTDAIQND…
CYP9F31	MIVEFIILLSLALFVFYKWATYNFDFFDKIGIPYAKPFPLFGNQLGMVLRRVSMYDSVNSLYQQFDTKIYGIFDQRTPIFGIRDPALVKQITVKDFDHFINHRTVFDDRDGGLFGNSLFVMRNDKWKDMRSTLSPVFTGSKMRQMFVLINEVAKESMDFLKEKSKGHKEIDFNIKDYFTQFTNDTIASAVFGLKVNSFKDEKNEFYQMGKRVTRFTALQNLKFFLFFNFKYIMRLLRIELFSRKDTQYFLRLVLDAMKYREENKIMRPDMVNMMLEAKGIFINKEEGQKPTTDKKWSDEEIVAQFFLFFFAGFETTAIMMSFAATELMMNPDCQEKLRQEVFEVLEELDGKPLTYEALQGMKYMDMVISETLRKWPPAVSADRQCNKDFVYKDDDIEVT…
CYP9F32	MIVESIILLALALFAFYKWATANSDFFEKIGIPYDKPFPLFGSQKDLVFRKTSMFDNVNRLYKQFNTSLSGLFDQRIPTFIIRDPVLLKHITIKDFDHFVNHRTVFTDKDGGLFGNALSNMHNEKWKNMRSTLSPVFTGSKMRQMFVLINEVADESIKFLKKDGQKEIDFNIKDYFTRFTNDVIASAVFGLKVNSFQDEDNEFYAMGKKVTKLTAWQNIKFMMFTNFKYIMRIFKIQLFDIKYTNYFTRLVMDAMKYRQEHKIMRPDMINMMMEAKGMSIDRKPGEKVTVAREWSDEEIVAQFFVFFFAGFEPTSVLMSFASHELMVNPDIQERLRQEILEVKENLDGKPLTYEILQGMKYMDMVISETLRRWPPAPVTDRECNKDFHYKDDTIDVTIK…
CYP12AV1	MFRANKVSVVLRQQVNFLRALATEAHLKLQIHAEEAINTTRDSEWLNARPYSEIPRQSKFDFITSFLPGGRFRNASATETTLTLKEELGDLFIIPGLFGRSDLLMVLNPDDIEKVYRTEGLWPVRGGFETVAYFRNVIKKDFFGDASGLVAAQGEEWERQRKAINPVIVQPKSAKLYIKPLVDNSQEFVERIRDIRDHKTLEVPGNFEEYIKRLTFDSIASISLNQNFGLIRGQKENPEALQLFENIRKFFIYIFDLEMKPSMWKIFNTPTLKKMVKCQEEIFEITSKFVSDALVELETKKSLTSENQEPSILEKLLKIDKKVAIVMSMDILLAGIDASSTVLAGLLLTLAKNPAKQAILREEVMKIMPTKDTPLTVDSMKNMPYLRACIKESMRYYPV…
CYP12AV2	MQIHAEEALNATHDSEWLNARPYSEIPRQSKFDFITSFLPGGRFRNASATESALTLKKELGDLFIVPGVFGRSDILMVLNPDDIEKVYRTEGIWPVRDGFETVAYFRNVIKKDFFGDASGLVSSQGEEWGRQRKAINPVIVQPRSAKLYIKSLVDVNQEFVQRIRDIRDPKTLEVPENFEEDLNRLTFDSITSIALNQNFGLIRRQKENPEALRMFKNVRNFFIYIFELEMQPSMWKTFSTPTFKKMMKCQEEIFEITNKFVSEALVELESKKSLASENQEPSILEKLLKIDKKVAIVMTMDMLLAGVDATSTVLAGLLLTLAKNPAKQALLREEVMKIMPTKDTLLTVDSMKNMPYLRACIKESMRYYPVNSGNFRSAGRDIVLSGYQVPKGTSSILN…
CYP12AW1	MKVILKSTPIVRLKCATLSPLTRRLVATSSLKLDYLDSASWSKAKTYEEIPGPTKYELFRGFLPGGQYHKKSFEDYILQARKQYGDVFRIPGTFGKDDVVMVFNVDDIQKVFRTEGVWPTRPGLDSMTYYRKKYRAELYDKAEGLMASHGKAWASFRTAVNPVLMQPRNAKSYVIPMQRVNSEFIQRIREIRDPVTHEVPDNFFEEINRLTFESVAVVALDKELGLIRKNRDRADAQKLFKSLSMFFRLMYELDFQPSLWKYVWTPAFAQYKKALDTIFETTIGYVEECLQRMEKKNPASEDARELSVLEKLIKIDKTVAIVMALDMLLAGVDTTSSVMSGLLLEVATNPEKQQKLREEILKALPEKNSTFTVESMKNLPYLRACIKEGIRMHPIGVGF…
CYP12AX1	MQRQVGEIIKKSANLFRTQQLRSITQTIEKISDENTARNRDWQNAKPFEEIPRPTAFQFIRGVLPGGAFYNLDVGDFVKKAREVYGDLYILPGFLGRPDILMTFNPDDMLTVLRVEGSWPYRRGFETMVYYRKVHKKMEDGDVIGLVGANGEDWSKVRSAVNPVLMQPKNAKLYLNNMLEVSNEFLQRIREIRDPMTLEVPETFEDEINRLTFESVAVVALNRQLGFIRKNRNDEEAELLFKTLRSFFQLSLKLDIGPPIWKYYKTKSFKQQMKNYDTMGEICSKYVNEALDKIENDKSPRNENEEMSVLEKLLKIDRNIAKVMAQDLIAGGVDTTSSTLAGILLCIAKNPVSQEKLRQEIRTVLPQKDSLLTIDSMKNLPYLRACIKEGMRIYPIGGG…
CYP12AX2	MYQVKILQRSIQLGGSSAIQLKQLRSIAQFNVKSVETVNEISQSEEWAQAKPFSQIPGPNKLQLIRGFLPGGVFHKKSFNDFALINRDLYGELVRVPGVFGKKDIIMSFNPDDFRTAIRSEGIWPRRRLLETLSYHRRTHRKEDFGSAVGLLATNDEEWSKIRTAVNPVLMQPRNARLYLNKMLEVNNEFLQRIREIRDPNTLEMPDTFEDEINRLTFESIAVVALNQQIGLIRRDRDNEVAIRLFKVLRKFFDLVLHLDINPSIWKIIRTPKFNEMMKNYDEMYDIIMKYINEALVRIDNDTSVKAEEDKGVLEKLLKIDKRIAIVMSMDLLMAGVDTTSTTLTGILLCLAKNPEKQAKLRQEIRTILPQKDSVLTLENMKNLPYLRACIKEGIRIYP…
CYP12AX3	MHRQVVQVIKNTSHFYQTQQLRSITQTIKKISDGPTLKNGEWQDAKPFEEIPGPTRFQLIRAFLPGGIYHNLPIADFIKKSREMYGDLFILPGLLGRPTYLMAFNPDDVLPALRSEGSCPHRRGVETMKYYRTVHKKDQFGNVIGLASSNGADWGKLRSTVNPILMQPKNAKLYLNNMLEVSDEFLERIREIRDPKTLEVPETFEDEINRLTFESVAVVALNRQLGLIRKNRNDEEAKLLFETLRNFFQLTLELDFGMSIWKFYKTKKFHQQMKNFDILTEICTKYVNEAIDRIENDKTPRKDNEEKSVLEKLLKIDRNVAKVMAFDLIQGGVDTTSSTLAGILLCIAKNPDKQEKLREEIRGILPQKNSRPTIENMKNLPYLRASIKEGMRVYPIGSG…
CYP12AX4	MLSKSLINKNSSVLSLIVRRHFESQCPRNASVDTTTEISTEWKNARLFKDIPGPSKWELLRGFMVGGEFYKKPVSDFFTTLQKRYGDFLLLPGMFGKKPIIMAFDPNLYSEVFRNEGIWPARRNFDSAYYFRKVYRKDYFQGKEGLLFSSGESWSKFRTAVNPILLQPKNVKQYLNKMIPVSDEFLQRIRDIRDNNSLEMPDNFLEEINRLTFESVAVIALDQQLGLIRRNRDAPEAVALFKSLRDFFGLAYELDIQPSLWKIIKTPKFYKMMRVSEKMFQITKKYIEDALERLEKNPNKDSNYQKSVVEALGEKDKLLAIVMAMDMMLAGVDTTTTSLTGILLGIAKNPEKQEKLRQEILPILSHKDSVPTVENLKNLPYLRACIKEGIRLYPIGPGT…
CYP12B9	MLSLEKINSGNIRKLFLRWMSMEVSTKIPKSANNSWDTSQIDNEWLNAKDFNEIPGPSTFKLLSQYLPGGKLHNSNLIDFYKFLRDEYGDISLIKGIMGKPNVVFTYNPVDIEKVYRTEGIWPIRVGLETFTYYRKKIRPDVFKNVGGLVSEQGKSWADIRNKVNPIMMKVQTVRHNLPDIDEISLEFLERLEKLRDPVTQEIQTNFHDEVKLWAFESICCIGLNKRMGFLRSSDSIDADALRLSDAMSRFFQLSFEFDVQPSIWKLYETPKFKTLLQTYDEITEITTRYINESTSRFGKDVGPKGVFEKLCCIDKQTALVMAIDMLMAGMDTTSSVFLSTLYMIAKHPDKQDSLRKEVMQILPDKNTLLTNENTKNTPYLRACIKEALRITPITPANF…
CYP12W2	MGITTWNYSFEIHLSKIPDNLLPEHIHICGRFYKKPLPEVNRLYRKDYGEIFMLPGIFGKRDVVFCFDPEDYQKVFRTEGIWPVRRGLDIVHYYRKILRPHIFKHAAGLVAEQGENWAHFRKITNPVMMNPKTTKFYVSRMDNVMKEFIDRIKMIRDPDSFEVPEDFETDLNHWAMESACLVALDTELGLINHAEKNPEAKEVIDGSKYTFELMYELDFEPSLWKIIPTPKYKKIVASFDKVTELTIKYIDAAIERLKNNPSAENKPDSEKSVLEKLLNIDREVAIVMAMDILLAGVDTTSSALTGCLICLSQNPNKQAILRSEILKILPDKNTSLNAEKMKNLPYLRACIKEAFRLFPVSVGQFRSTGRDLVLNGYRVPKDTDIAMPSQILMRDEKFY…
CYP18A1	MGNEKHTRFMELAKRYGSLFSTRLGTQLTVVMSDYKLIRECFRREEFTGRPDTPFMQTLNGFGIINSTGKLWKDQRRFLHEKLRHLGMTYMGNGKHMMETRIMTEVHEYIHNLHSSEGQPMDMAPAISVAVSNVICGIMMSVRFSIDDPKFRRFNFLIEEGMRLFGEIHTVDYIPTVQYLPGVSNAKNKIAKNREEMQRFYRDVIDDHKESYDASNIRDLIDVYIAEIENAKLEGRDQELFDGKDHEEQIVQVIIDLFSAGMETIKTTLLWINVFMLRNPEEMRRVQEELDQVVGRHRLPSIEDLQYLPVTESTILESMRRSSIVPLATTHSPTRDVEINGYKIPAGSHVVPLINSVHMDPNLWDKPEEFNPRRFIDSAGKVHKPEFFIPFGVGRRMCL…
CYP28N1	MIFSIIVTFSLMATLIGLGYLFLTWNFDYWKKRGIKGPKPTPFYGNFPGMVTKKRHLAYDMQDIYNQYHKDEDFVGVFMMRDPELLILSPEFVHKVFVTEFKSIHDNEAATWIDSKNDKIMGKNPFVLRGDEWKERRQEITPGITTSRVKAVYPVTLEVLEKLTKYIKHASVKADKNGINAKDEVVTDGVLGIKAESLSDNPTPIFAMTKKLFEQTTIFTTYAIIASFWPFVKKYYKAKFFPADTEDFFIGLLKKALDIRRSQKTDRMDFLNYILQVQEKKQFPNEQLLSHMMTFLIDGFETSATVITTCLLQLAKNPAAQEKLRQEVLSKLNKNGQLDFETLEGQTYIDQCLYESMRIVPTLIFSKKLVSEPIELTSRNGVKIQLKRDDIVLIPSFSL…
CYP28N2	MIFSIIVTLSLIGILLGLVYLFLTWNFDYWKKRGIKGPKPAPIYGNFPGILSQKRHIAYDMQDIYKQYHQDQDFVGVFMMRSPMLMILSPEFVHKVFVSEFKSIHDNEAATWIDKKNDIVVANNPFLLRGEEWKERRQEITPGITASRIKAMYPVTLGVLDKLTEYIKHASLKADQDGINAKELSLRFTCDVVTDSVLGVKAESLSDNPTPIFGMAKKLFEQTTFFTTYAIIAGFCPLIKKFYKAKFCPGDTDTFFIGLLKEAIDMRRSQKTDRVDFMNYIIQLQERKQLSNDKLLSHIMTFLLDGFETSATVITMCLLQLAKNPAAQEKLRSEIRSKLNKNGQLDFETIDGYTYIDQCLYESMRVITTVIIYKKLVAEPIELTNRNGVKVQLERDDIV…
CYP28P1	MISSLSLIGIALLLGYYFLIWNFDYWKKKGVRGPKPTPFFGNFPNMVKQQDSTAIDILNIYRQYRDDEDFVGVFQMRTPQLIVLNPHLAHQIFVTDFNKFRDNELSTWINGDKEPVMSNNVFMLCGDEWKERRKDMIPLLTANRIKAVYPATQETCGKLTEFIKGNLKDVDAKDLSLRYTSDVVTDCVLGVKANSLSDNPTPILKWTKVLFQQSTAFVAYVFAASLWPTLKSIIKIKLFRQDVEDFFFKLVNDAIKLRRQNSVERGDFLNYLLQLQEKKNLSEIDMFSNTMTFLVDGFETSALVLSSCLYQLAKYPVCQEKLHHEIESNLGIDGKIEFDQLETLPYIDQCIHESLRIMPPLLFGNKLCTQPTQLENKNGDVLQLRPREAVLIPFYAFHH…
CYP49A1	MPILGNSWRFAPLIGHYKINELDKVMKELHINYGKMAKVGGLIGHPDLLFVFDGDEIRNVFKKEETLPHRPSMPSLKHYKGHLRRDFFGDVAGLIGVHGKNWEKFRQDVQHILLQPNIAKKYIPPLNEIATEFMTRIHEMRNENDELPANFLHELYKWALESVGRVSLDTRLGCLSPNGNEDSQKIINAINTFFWAVPELELRMPIWRFYPTKAYRAFVSALDSFTEICMKNISLTMDKAQASSSDGSAIRDEADISIVERIVNKTGNRKLAAILALDLFLVGVDTTSVAASSTIYQLSKNPDKQELLFQELKSIFPQREAEINQNVLERMPYLRACIKETLRMYPVVIANGRSLQSDAVIGGYHVPKGTHVIFPHLVVSNNTAYFPEPKRFMPERWMK…
CYP301A1	MRSSPLLGKTKSIITALSEISLKPQCEQYTTCPHAATATSASSATDVSSSKEWENALPYHEVPGPKPIPILGNTWRMMPIIGQYTISDVAKISSLLHERYGRIVRFSGLIGRPDLLFIYDVDEIEKCYRNEGPTPFRPSMPSLVKYKSVVRKDFFGDLGGVVGVHGEPWRQFRSRVQKPVLQLSTVRRYLGPLEEVTNDFLQRCETLLDDKSELPDDFDNEIHKWSLECIGRVALDTRLGCLEPNLSEDSEPQQIINAAKYALRNVATLELKAPYWRYFPTPLWTRYVKNMNFFVEVCMKYIKSATDRMKSAGYTQIGEPSLLEKVILSEKDEKIATIMALDLILVGIDTISMAVCSMLYQLATRPEEQEKVREELRRVLPTPDTPLTVQLLDQMHYLK…
CYP302A1	MLKSFRSQENTLKKHVYYLYCTQAIETNKIRSFDDIPGPRGPLGLGNLYNYLPVIGKYSWLKLHKSGFDKYKNYGSIVRETMAPGVNIVWIYDPNDIAMLLNDKDYPHRRSHLALEKYRTDRPHVYRSAGLIPTNGAEWWRLRSELQKELSAPKNVRSFLTDVDKITHEFLDVLPVKTEFNLLPELARLNLELTCLLTFDERLDAFSPEEHHPDSRTSKLIKSTETTNSCILPTDQGLQLWRYFETPTYKKLRKAQNYMESVAVDLVAQKLAYFKEENSQQTSGGSLTRSSLIEEYLKNPNLDLSDVVGMASDLLLAGVDTTSYSTSFAVYHIARHPEIQEKLYEEARTVMPSVNDFLTGEALRTGITYTRAVLKESFRLNPVSVGFGRVLQKDIVLSG…
CYP303A1	MFYTVIFFFILILIFLLWDCKKPENFPPGPRWYPIVGCALQLSQLRIKTGLFCRVIDELVKTFVNPYGVYGLKIGKDQLVVAYYKNAIQEMGFNEDLDGRPEGIFYRTRTFNSKKGILLADEEFWVEQRRFIIHHLKDFGFSRRGIIVFIREEAQYLVEDIRKRIKIAGGKSAIIYMQDLFPVFVLNSLWRLMASKRYDRESEEVMALLNMFYELLKNVDMIGSKFSQFPFMRYLAPEYSGFNGFVESHHRFYAFLRREVEEHRQSLNLDDPPRDLMDAYLQEIAKPEHSESFSEEQLLSVCLDLFLAGSETTNKSLGFAFLHLAKNPTIQRKAQAELDSVVGRERQPCWEDKPNLPYCEAIVYEALRFFMGHTFGVPHRALKDTRLCGYNIPKDTMVV…
CYP304A1	MITLTTFLVTVLVSIFLYISYNYVIKRPKKCAPGPPRLPVFGSYLFLMLAGGKWLHKGALWLSKIYKSDIISLYIGNTMTYVVHSPEGVKEILNNSAFDGRADLFVVRMRDPNHNIKGIFFQKGPVWKEQRRFILRYLRDFGFGRRFQDLEQVINEEIKDLIDLIKNGPQFEHEKSVARSGQILLPLIFSACTANCILYVMFNDRVPRAEHKTLFDLGRNGLAFQRNNDDYGKMLSIIPWIRHIFPEMSSYRAICESHTFIYGFFEGWIQKYMKTYTEDSERNFVDLYVQQMRKEQMEGDHTNYTYDQFVLSLVDFAFPAFTAIGVQISLIYQWMLLRPDVLKKVQHEIDEFVGSGRLPCLDDRKNLHYTEATIREGLRMETLVPSDVPHVAMEDTEFF…
CYP304A4	MITSILLIALGTLFLYISYCFGIQRPKGCPPGPPRLPIFGSYLFIMLAGGKWLHRGAQWFSKLYKSDIISIYLGNNLAYVVHNAEGVKEILHNKIFDGRPDLFIARMRDPNHNRKGIFFQDGPIWKEQRRFILRYMRDFGFGRRFEVLESVIREEILDLIDMIRNGPKFDHEKEIARKGQLICPLAFSCLTANSILYVMFNERIPREKQSDLLNLGFYGMELQRKADHYGKLVGIIPWIRYFFPERSAYRPMLESNKFLYGFFESMIEKYAKTYDENHERNFVDLYIKEMRKEQKENSDFTSYSYDQFVLSLVDFSFPAFTAIGTQMSLIFQWLLMKPDVLKRIQKEIDDCVGSGRLPCLDDRKNLHYTEATVREGLRMDSLVPSDVPHLALQDTEFFG…
CYP306A1	MHALLHSMGNIVNDLVFGITYSKHDVIWKYLQELAEEGVKHIGVSGVVNFLPFLRFLPSNKKTIKYLLEGKRKTHEIYDRIIDDCTKNLEINTSGGGDENNRVTILKSFLLERKKRVEANDPSSKFYCDDQLRHLLADLFGAGVDTTLTTLRWMFLYLAKYPEYQNKLRSELSIFDKNNISLDDIDGIDLMKACVSETERIRAVVPLGIPHGTVEDMIINGYKIKKNSMIIPLLWATHMDPNLWPNPEEYNPYRFITPEGKYSRPQHFIPFQSGKRMCPGEEMAKMLLFLFVGITLKNFKISIPKNQEINMEGECGITLTPPSHKLIFQPIPH
CYP307A2	MEFAVFDALILIIVIIASGTYLKVIYDCFRKARVATTQFGKPAAQNGNTPKNSETTVREYKQAPGPIPWPILGNLDKLGKYKVPFEGFTALAKEYGDAYTLTLGTTRCFVVNNLELIREVLNQNGKFFGGRPDFLRYHKLFGGDRNNSLALCDWSQLQQKRRNLARRHCSPRDASSYFSKMSDVGSIEIGEFMDTLDKRITPGQEIEVKQTIHQACANMFSQYMCSVRFDYEDVEFQKIVWWFDEIFWEINQGYAVDFLPWLAPFYKKHLQKVTNWSTGIRKFILERVINDRERNIDLDEPERDFTDALLKSLAEDKNVSRDTIIFMLEDFLGGHSAVGNLVMLAIAYVVRNPEVGIKIQEEVDRITEGKRTVNFMDMEIMPYTMATIYETLRYCSSPI…
CYP309C6	MDFFLLTLSLILICFAAIYSYLTWNFNYWTKRKVQGPRPVLFFGNVPSLVKHNRHMAFDMQEIYENYKKSGQKFIGIFMTRNPQILVIDPKTVREIMVSNFKVFRDNEASLWINRKVEEISKRNPFFTLSKDWKEHRTDVVGGLSANRLKLAAPIIFEACNKLTGFVRNEIDQSRNVIELKTICYNYTIEVIADFVWGINAGAFQSDKTANVMLDMSRNLLDSSFKRTNFYYTWGVLPFVRNLSKMRFFREQTEKFFIKIQKDALELRQRNRTICGDRPDFLNYLIQLSEKKNVSLNGMVGHSLTVLLDGFETSGAVLYHALYYLASNETAQKKLRQEIMENLDADNHIGFDTLMELPYLDQCVNETIRLISPIPVFSRRCSEETYLECSDNTRVKIDP…
CYP309C7	MITALLSAFLLNVILGALAYLYFTWNFDYWTKRGVIGPKPSLIFGTLPSVIKQNRHFVFDMADLYEKYKKCGERFIGIFMTRNPMILVLDPKLAREVLIYNFKCFRDNEAALWVNRKKEEVASRNPFLAHFADDWKERRSDFMCGISPSRLQQAYPILTQTGKKMTEFVKSQITKSDNIIDAKSIAFKYTVEIYANFVWGIDTDAFKCVDDTQNIVLNMSNLFMDLSFLKVNLVNISSLLPGLKILLKNRFYAEETDNFFSKLQSYAVDMRCRTKDPRSDFLNYMLELQRKKNISHVDMVGHSLTVLLDAFDTAAIIIYHTLYFLAMNERAQTKLRQEILANLDEDGGISYKALISLEYLDQCVNEAIRLVSPIPDFSKICTETTYFENCENKRTKIER…
CYP309C8	MIGAIISVSLLSVILCALAYIYLTWNFNYWTKRGVIGPKPALILGTLPSVIKQNRHFVFDMADLYEKYKKCGERFIGIFMTRNPMILVLDPKLAREILIYNFKSFRDNEAASWVNRKKEKVANRNPFLSYFADGWKERRNDFMGGISSSRLQQAYPILNQTGRKMTGFIKTEITKSNNIIDVKSMAFRYTVEIYANFVFGIDTDAFDCVDDKQNIILNMSYCFIDLSFLKINLVNISSLFPGLKKLLKNRFYAEETDNFFSKLQTNAVDMRLHTKDPRSDFLNYMLELQRKKNISHVDMVGHSLTMLLNAFDTVAIVIYHALYFLSLNERAQTKLRQEILANLDENGGISYKTLTRLEYLNQCINETIRIVSPISDMSKICTETTYFENCENKHTKIER…
CYP309C-fragment	MRHFLSSICNKPSVDIRTTLSFLTEVKSLCHKYTIEIVADFVWGLNADALKLDDSPSPMLKMSETMLEKSFLKIGFYYISSLAPVIRKLVGGTFYPKETDQFFTRVQKDALEMRHRNPNDRPDFLNYLIQLQEKKNISHMDMVGHSLTVLLDAFETSAEAMSHTLYYLARNEEAQKKLRAEIEAATDENGSVSYDVLTELPYLDQCVCETIRIITLLSVYSRICSDVTFLENREGHKVKIEPGMVVHILPYAFHNDADVFPNPEEYIPERFDNGRAKELNQQGYFFPFGDGPRICAGMRLGQLEVKAGIVEIVKNFKLKVREACAQSIDPTSFLLGISGDILVEFEAIR
CYP309D2	MDSISLTVVFVLGSSVIGLVYLYLVWNFNYWKCRNVNGPKPRILFGNLPSLVRKHRNYNFEIAEIYEEFKKTGDRFVGIFVTRNPAVLILDPLLARDVLTNKFKSFSNNELSLWGNRATEKVSIHHPFITRTDEDWKERRNDFMSGISDSKLQQTYPILVDVNYKMTNFLRSEITKTGGIIEIESLLGIVPYLKKIVKNRFFDARFDLLNYILKLQEKKNLSNMDVVVHSMSVVLDAVDTTAFVILHTLFLLAYNSRAQEKLRQEIRENMNDEGEIGFKTLLNLEYLDQCISESIRIFSPNPILSKICTEEISLEINNDQTKNIDPGMIVHIPCFAYHHDPEIYSDPEEFIPERFDNGRAKKFSQQGQLIPFSDGPRICAGLRLAQMQCKACVFELVKN…
CYP311B1	MGLVILFFALLFVIRFAKRYFNLIRSAHRIPGPWIVPFIGNVQFIWNLKPKELFSKIDEHRLTYQKTFRLLLGNQLWVFLHSSEETRAALNEDSLLRADTFNKLNVLLGNGLLLSEGKIWYNHRRSFAPAFHPNVLASFTEKIYYHSDVFVDRVLSRKELEISEYVFPCMLDTICETSMGKNLRTQEEDSSPIVHAFHDASEILFERMSNPFYFIDWVFNLTKSSKILRKSINLIHNLTDEIIKEKADDIKTNGADQPTGKFNRTLLHILLTTETDGKPLTFQEIKDEVNTFLFAGVDTTAAAMNFIFYSLAKYPECQKKLYNEISSYPPDSYPNISELKYLDMFIKECLRLYTIVPLTGRQVTKNIKIGENELVPGTTIWINMYGLAHDSKYFPEPKK…
CYP313A8	MIFNFLFGGFVVLLSYFLWSRRRFYHLFYQLPGPMGYPIIGMAHWLTKREEILNVFLKMEGIYGRKFVSWLGPFPFFVIAEPELAEAVLTSPDCVNKAFIYDALDDGTGKGLFSLKNPAWSHHRKLLNPAFSHKVLLSFLPIFNREADNMNFDLSGVVGAGEVDLSTIIQKCTLNIAAQTTMGRQMANVTDQNEDLLPCFQSILETMTSMLFTPWLRFKFLLKMASHYPSYLRSKNTLRSFIQNLIKEKLVQKEAESKISELQPSTDVDIKKNPNIFIDRAIDLVKTGDFTWKEVEDESNVIVFGAFETTSNTVGYTLMLLSMFSKYQDKVYDEAQSIFQSKGSDTDLTYEDTQQMTYLDMVLNETMRVMAPVPVIAREAMRDVKLSNGIVLPKGLQIA…
CYP313B7	MLSTSVLLSVILVLWLYVLWSRRHFYIAAWKLPGPIGLPFLGVGLKMRDPESFLSYLTTITKEYSSPCISWMGSKCFLYAADPDTIETVFNNPNCTNKGDFYRFMAASIGDGLFTSSSPRWNKHRKLINPAFSRQIINNFMPIFDSAANILLKKFQTCGDQKQDIYDLLKKCVLQTACQTTMGKKMEIQSDGSSEAVFRSYKNIMDVSVQRMLSPWLYPDLFYKISSLYVLERETVKILYDFIEGLLQTGKPSLGNSIPVSSENEPEGDNLSKKSKSIFVEQVRNYVEQGLLTWEDIRDEANVIIAATFETTSTALYFVTLCLAIHPEYQEKLFEELQIVFPDKQFEITKEDLDRMTYTEMVINEGMRLFSPVPVVIRTASEDFFLKNGVKIPKGTQVG…
CYP314A1	MAFILLVSLAVLLAVYLNCNFQKLQSSLFWLGRRCDKLAVVKQGIWDVPGPCPVPFLGTKWTFLLGQYKLSQLHEAYKCMNEKYGPIVLEVTPGGIPIAHLFEKSDIERVLKYPSKYPFRPPTEIVVYYRNSRPDRYASVGITNEQGPTWQRLRSALTSHITSPKVLQNFLPSLNSVCDDFIDLLRHKRNPDTGVVEHFEDVANLMGLEAVCTLMLGRRMGFLSTDAKQPEKVMLLAKAVKQLFVSQRDSYYGYGLWKYFPTKTYSKFSESEDFVYDMISEMVEQALLDEEADVANLDDEDVRSIFMSILQLKDVDIRDKKSAIIDFVAAGIETLANTLIFVLNFVTSHSSATEQILSEFQVNANSAILQDTITNARFTKACLQETYRLQPTAFCLARI…
CYP315A1	MNVCDQIRRQTTIEITKIMSNNKIKPNYLLVTFSFAYTWLQNIWFWISENVCVLFRLNCDSKDSVNVKLKLRGQHKGIKKFEEIPNAKGLPLFGTILEFIANGSAPNLHKHIDKRHQKYGHIFREKLGAQEAVFISSANLMRSVFLYEGQYPTHPLPESWVLYNKVHNCKRGLFFMDGLEWHTNRKILNRLLLNGNLNWLNLHVEYCTRKLISNWKIESKNRDYFQINDLEERLYRWAIDVVCSVMFGFKENEASNIQLTTAIDAFSKNVHKIFKSSASLMNFPPKVAKALRLKIWTQFEHDVTNILKMGNYIIDMEIRSENECHEGLFIKMKSAGMTLEVIKRIFVDLIIAAGDTTAFSSQWALYLLSQDSELQKKIRNEELSSDTENSVLHGFIKET…
CYP318D1	MSFFPTYNSVASSLQDKFNDYLGVQEFNDIEDIISRAVLVTACQTTMGTETNFLENDEHEIAQTYKKLLRISSIKTIKPWLQIDFLFRMTKLYNTDVELNKMAADFVKDIVSRKHTEWKKNERNTSTIESTPWDDVDEEQGTAQRRKRNFIEQIFHLAENGEITLQDIMDECNSMVLVAFETVSNSILLALLCLAMYPETQKKLRQEILSTFPNGDVSSISGDNLKDMKYLDMVINESLRLVTTIPMALRGVSEDFVLKDDIVIPKGTFIILDTFNMQRDPVLWGPMAEEFYPEHFLPENVAKRHPYSYVPFMKGLRFCIGWRYSLMLTKVIIAKLIHSYKFETETKLKDLKFIEGISLKIRDCDRIEFTVSRV
CYP437B1	MIVTISIFAILSVTIYVYLRWNFDYWHKRGVRGPKPEILTGNFSKSSRGECSYVDELNDIYLNYKNTEKFVGIFVTRNPRLFILDPEIARQILLTNFSSFYDNESSKWSFPKIELLRMQSPFVNVGEAWKEKRSEIVPALTVSRLRALYPAMQQIAKKFTDFVRAKNGKNLDAKELSGRFTIEVISNFIWGIDANAFNDEQPSQVHEIAKGMIKQTVKCVGYYVKTAAFPWIRKLRPQRFFPESSDKFFTHLTMSLIKHRLENPSERSDVLNHLMNLASKKTLTEAQLAGHSTTVLIDGFESAALAICHCLLLLGRNKAAQDKLRSEILENFDKENGIDFEKLNDLPYLDQCIHETLRLFPPLSTFTKICTSPTTLENSDGRRVQLKPGDMVHISAYSF…
CYP438A8	MLGVLLLLGTVFLIAFHWIWSSTYWSRQGIKGPMGMPIFGNMFRYLIGRRHYGLVYDDIYKAYPKASYIGFYRVMNEPAVLLRDTETIKEIMVKSFPNFTDNVLYVNEKREDLIFCNPFVARGEKWRVMRSELVPMFTPNKVKLSFPHIATTCQKLDSFISASIGDSPFEGKDLCAKYTLDVVASAAYGLDGQSFTNKSSDFTKLVKELFMPNPLSLIHTTALLFLPKLGDFIHYRYLPTKVQQWFVTIISKVMSQRRESKDGSSGDFLQWLMDAKQKTGESIDDFTIIGHCSTLLIEGFETSAALMSFALYEFSVNPHIQKRVQAEIDEVMKKYNGKLCYEAILEMTYLDAALYETLRLHPPMLALLKHCTKPFELPPQFKGVKLTEKVVIEEGTVFV…
CYP3954C1-fragment	MFLFNSHLRISIDRSLAPWRKINAIFYFNKFYNSYVTSRKYIYSFITDLINEKFKKMEGLYLNESTEDKVDIIKSRRIFIDQAVELYRSNLFSWKDIFIESNVLVLAAFETSASSLNTVLILLAMHPQYQEKLYEELKLVFPDGTDDISFEDLQHLVYLDMIINETLRVAATIPLLGRDANGGDVKISDELSIPKGTSILIDIFNLHRDEDIWGSQAKEFNPDNFLKQNLDGKHPYAFIPFSKGPRNCIGWRYAEMFLKVILSKIITNFRVTTTSRFEDIRFTMNMSLRCEVMPQLELHRR
CYP4688A1	MEYIIESFCASILFLYIFYKWTNKNVEFFAKRNIAHEKPIFLLGNNLTVLEGRETTQELLIRLHNQFKKEKMYGYHDFLTPKFIISDPQLIEKVTVNDFEYFLNRCENQAILSDDTASRMLCAANDKTWMEEKAMVLHLFSEDKIRQVIEVVNECNTAAIMYLRRKIKTEGKEIDLEDYFHRYSNDVIASAAFGVKINSFNNRDNEFFNMAADLLRTRSLFAALKAFYLTISPHVYKIYRLNRVYIKALQFVRNTFSRIFSSHQGGQSISGNPKDFQKGMEFTEIIRGFLTKFSSAIKSTVLIVFPQISLIVNFIFFLQSIRSYVKNFFNPKPKERKEERITPTIDEIKPRDKKNKVVRGGQVVLRNIAGGVKSVILAVFPQLIIISRLYLFIKTAVNY…
